# Supplementary material for: DMSO-mediated palladium-catalyzed cyclization of two isothiocyanates via C–H sulfurization: a new route to 2-aminobenzothiazoles
Source: Royal Society of Chemistry journal article supplement (doi:10.1039/c8ra09784d), 2019-01-01

# Supporting Information

## DMSO-Mediated Palladium-Catalyzed Cyclization of Two Isothiocyanates *via* C-H Sulfurization: A New Route to 2-Aminobenzothiazoles

Guangkai Yao,<sup>a,c</sup> Bing-Feng Wang,<sup>a,b</sup> Shuai Yang,<sup>a,c</sup> Zhi-Xiang Zhang,<sup>a,c</sup> Han-Hong Xu,<sup>a,c\*</sup> and Ri-Yuan Tang<sup>a,b\*</sup>

<sup>a</sup> Key Laboratory of Natural Pesticide and Chemical Biology, Ministry of Education, South China Agricultural University, Guangzhou510642, China;

<sup>b</sup> Department of Applied Chemistry, College of Materials and Energy, South China Agricultural University, Guangzhou510642, China;

<sup>c</sup> State Key Laboratory for Conservation and Utilization of Subtropical Agro-Bioresources, South China Agricultural University, Guangzhou 510642, China;

\* Correspondence: rytang@scau.edu.cn (R-Y.T.); hhxu@scau.edu.cn (H-H.X.); Tel.: +86-20-8528-5127(H-H.X.)

### List of Contents

|                                                                     |                |
|---------------------------------------------------------------------|----------------|
| <b>(A) General information</b>                                      | <b>S2</b>      |
| <b>(B) ESI-MS detection for intermediate A and B</b>                | <b>S2</b>      |
| <b>(C) Theoretical calculation for NBO charge of DMSO and PhNCS</b> | <b>S2</b>      |
| <b>(D) Analytical data for 2-10 and 12-23</b>                       | <b>S3-S10</b>  |
| <b>(E) Reference</b>                                                | <b>S10</b>     |
| <b>(F) Spectra</b>                                                  | <b>S11-S31</b> |

## (A) General information

All reagents were obtained from commercial sources and used as received. All reactions were carried out with flame-dried glassware using standard Schlenk techniques under an atmosphere of nitrogen.  $^1\text{H}$  and  $^{13}\text{C}$  NMR spectra were measured on a Bruker Avance 500 instrument (500 MHz for  $^1\text{H}$ , 126 MHz for  $^{13}\text{C}$  NMR spectroscopy) using  $\text{CDCl}_3$  and  $\text{DMSO}-d_6$  as the solvent and calibrated using residual deuterated solvents as an internal reference ( $\text{CDCl}_3$ :  $\delta$  7.26 ppm for  $^1\text{H}$  NMR,  $\delta$  77.16 ppm for  $^{13}\text{C}$  NMR;  $\text{DMSO}-d_6$ :  $\delta$  2.50 ppm for  $^1\text{H}$  NMR,  $\delta$  = 39.52 ppm for  $^{13}\text{C}$  NMR). The following abbreviations (or combinations thereof) were used to explain multiplicities: s = singlet, d = doublet, t = triplet, q = quartet, m = multiplet. Mass spectra were measured on an Agilent GC-MS-5975C Plus spectrometer (EI). HRMS (ESI) analyses were measured on a Thermo Scientific LTQ Orbitrap XL instrument.

## (B) ESI-MS detection for intermediate A

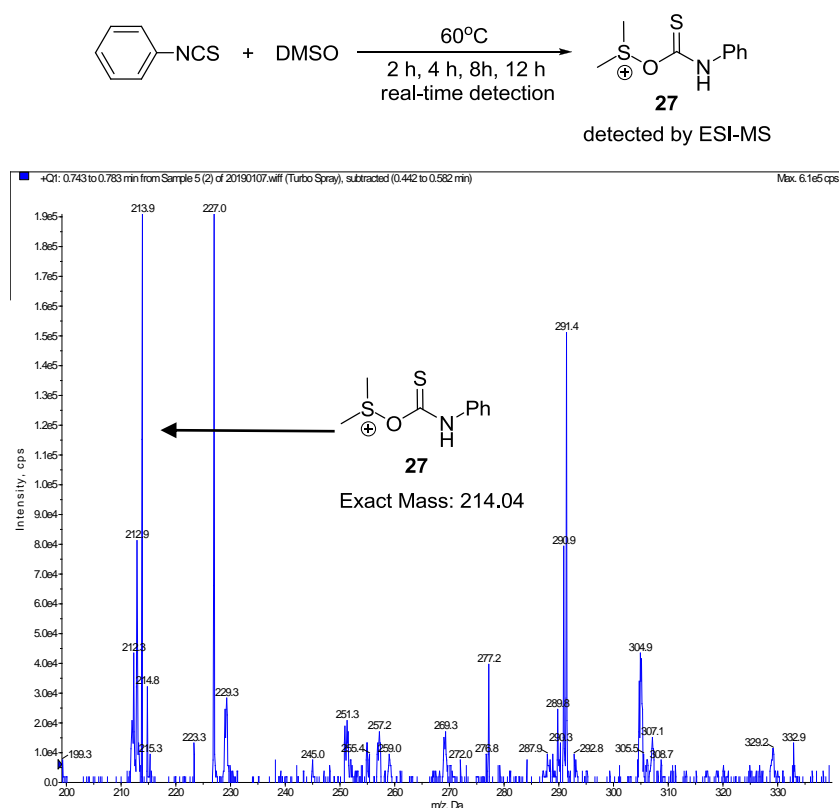

Figure S1. The real-time ESI-MS detection for intermediate A

## (C) Theoretical calculation for NBO charge of DMSO and PhNCS

All calculations were performed with the Gaussian 09 package.<sup>[1]</sup> Geometry optimization were performed with B3LYP<sup>[2,3]</sup> and 6-31+G (d, p) basis set. Normal vibrational mode analysis at the same level of theory confirmed that the optimized structures are minimal (zero imaginary frequency) or saddle

points (one imaginary frequency). Single point energies and solvent effects in DMSO were computed with the dispersion-corrected density functional methods using the CPCM solvent model.

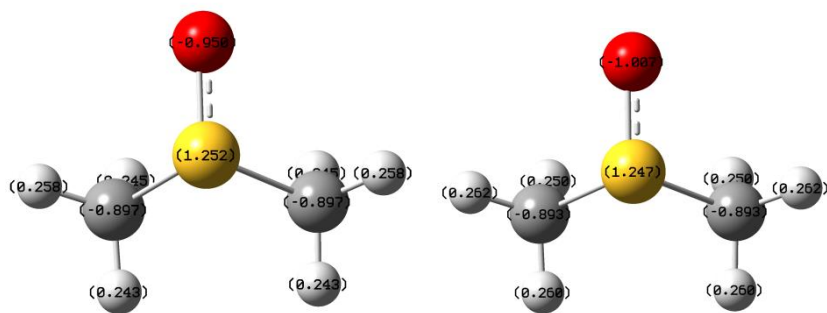

**Figure S2.** NBO charges of DMSO (Left: gas, Right: DMSO solvent)

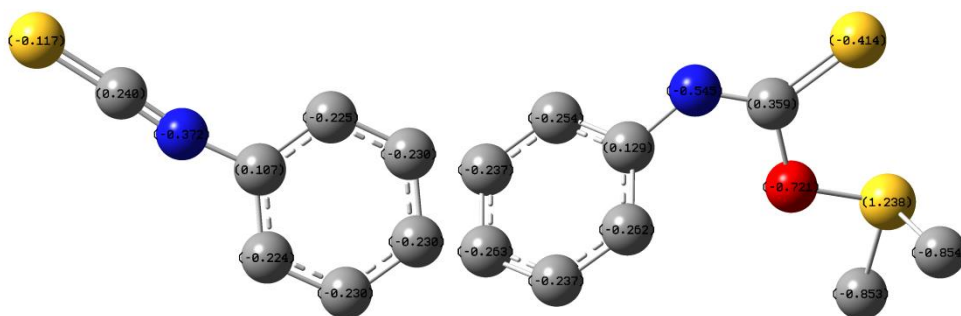

**Figure S3.** NBO charge of PhNCS and compound A

#### (D) Analytical data for 2-10 and 12-23

##### *N*-Phenylbenzo[*d*]thiazol-2-amine (2) [4]

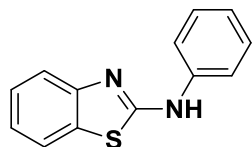

White solid. (37 mg, 82% yield). M.P.: 158-159 °C. <sup>1</sup>H NMR (500 MHz, CDCl<sub>3</sub>) δ 7.63 (dd, *J* = 7.9, 1.2 Hz, 1H), 7.56 (dd, *J* = 8.2, 1.2 Hz, 1H), 7.55 – 7.49 (m, 2H), 7.42 (dd, *J* = 8.5, 7.3 Hz, 2H), 7.35 – 7.30 (m, 1H), 7.24 – 7.11 (m, 2H). <sup>13</sup>C NMR (126 MHz, CDCl<sub>3</sub>) δ 165.1, 151.3, 140.00, 129.8, 129.6, 126.2, 124.5, 122.4, 120.9, 120.5, 119.3. IR (ATR, cm<sup>-1</sup>): 1627, 1569, 1456, 743. LRMS (EI, 70 Ev) *m/z* (%): 226 (M<sup>+</sup>, 100).

##### 6-Methyl-*N*-(*p*-tolyl)benzo[*d*]thiazol-2-amine (3) [4]

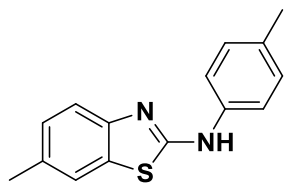

White solid. (39 mg, 76% yield). M.P.: 154-157 °C.  $^1\text{H}$  NMR (500 MHz,  $\text{CDCl}_3$ )  $\delta$  9.33 (br, 1H), 7.47 – 7.39 (m, 2H), 7.37 (dd,  $J = 8.0$  Hz, 2H), 7.21 (d,  $J = 7.8$  Hz, 2H), 7.11 (d,  $J = 8.1$  Hz, 1H), 2.41 (s, 3H), 2.38 (s, 3H).  $^{13}\text{C}$  NMR (126 MHz,  $\text{CDCl}_3$ )  $\delta$  165.2, 149.3, 137.6, 134.2, 131.8, 130.0, 129.8, 127.2, 121.0, 120.8, 118.6, 21.2, 20.9. IR (ATR,  $\text{cm}^{-1}$ ): 1612, 1538, 1451, 810. LRMS (EI, 70 Ev)  $m/z$  (%): 254 ( $\text{M}^+$ , 100).

#### 6-Ethyl-*N*-(4-ethylphenyl)benzo[*d*]thiazol-2-amine (4)

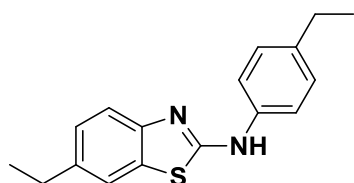

Yellow solid. (44 mg, 78% yield). M.P.: 137-139 °C.  $^1\text{H}$  NMR (500 MHz,  $\text{DMSO-}d_6$ )  $\delta$  10.28 (s, 1H), 7.68 (d,  $J = 8.5$  Hz, 2H), 7.60 (s, 1H), 7.49 (d,  $J = 8.2$  Hz, 1H), 7.19 (d,  $J = 8.4$  Hz, 2H), 7.15 (dd,  $J = 8.3$ , 1.8 Hz, 1H), 2.65 (q,  $J = 7.6$  Hz, 2H), 2.60 – 2.53 (m, 2H), 1.19 (dt,  $J = 15.4$ , 7.6 Hz, 6H).  $^{13}\text{C}$  NMR (126 MHz,  $\text{DMSO-}d_6$ )  $\delta$  161.0, 150.3, 138.5, 137.9, 137.3, 130.0, 128.2, 128.1, 125.7, 119.7, 118.8, 118.1, 117.8, 28.0, 27.6, 16.0, 15.7. IR (ATR,  $\text{cm}^{-1}$ ): 2951, 2856, 1605, 1541, 1451, 1251. LRMS (EI, 70 Ev)  $m/z$  (%): 282 ( $\text{M}^+$ , 100). HRMS (ESI) for  $\text{C}_{17}\text{H}_{19}\text{N}_2\text{S}$  ( $\text{M}+\text{H}^+$ ): calcd. 283.1263, found 283.1272.

#### 6-Butyl-*N*-(4-butylphenyl)benzo[*d*]thiazol-2-amine (5)

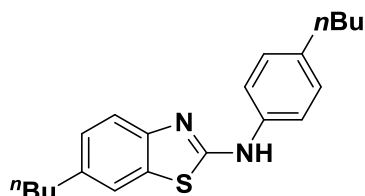

Yellow oil. (55 mg, 81% yield).  $^1\text{H}$  NMR (500 MHz,  $\text{DMSO-}d_6$ )  $\delta$  10.27 (s, 1H), 7.65 (d,  $J = 8.5$  Hz, 2H), 7.57 (s, 1H), 7.46 (d,  $J = 8.1$  Hz, 1H), 7.15 (d,  $J = 8.2$  Hz, 2H), 7.12 (dd,  $J = 8.2$ , 1.7 Hz, 1H), 2.61 (t,  $J = 7.7$  Hz, 2H), 2.53 (d,  $J = 6.7$  Hz, 2H), 1.63 – 1.44 (m, 4H), 1.36 – 1.24 (m, 4H), 0.89 (td,  $J = 7.5$ , 1.3 Hz, 6H).  $^{13}\text{C}$  NMR (126 MHz,  $\text{DMSO-}d_6$ )  $\delta$  161.5, 150.7, 139.0, 136.9, 136.4, 130.5, 129.1, 126.7, 120.7, 119.2, 118.3, 35.1, 34.7, 34.0, 33.8, 22.18, 14.26. IR (ATR,  $\text{cm}^{-1}$ ): 2955, 2922, 2850, 1608, 1540, 1456, 815. LRMS (EI, 70 Ev)  $m/z$  (%): 338 ( $\text{M}^+$ , 100). HRMS (ESI) for  $\text{C}_{21}\text{H}_{27}\text{N}_2\text{S}$  ( $\text{M}+\text{H}^+$ ): calcd. 339.1889, found 339.1873.

#### 6-(*tert*-Butyl)-*N*-[4-(*tert*-butyl)phenyl]benzo[*d*]thiazol-2-amine (6)

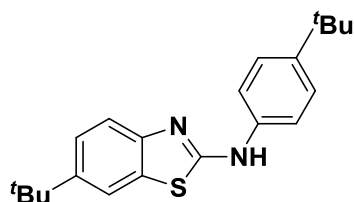

White solid. (57 mg, 84% yield). M.P.: 177-179 °C.  $^1\text{H}$  NMR (500 MHz,  $\text{CDCl}_3$ )  $\delta$  9.02 (br, 1H), 7.64 (s, 1H), 7.52 (d,  $J = 8.5$  Hz, 1H), 7.42 (s, 4H), 7.40 – 7.35 (m, 1H), 1.37 (d,  $J = 8.1$  Hz, 18H).  $^{13}\text{C}$  NMR (126 MHz,  $\text{CDCl}_3$ )  $\delta$  164.9, 149.2, 147.3, 145.6, 137.5, 129.9, 126.4, 123.8, 120.1, 120.1, 118.6, 117.2, 34.8, 34.5, 31.7, 31.4. IR (ATR,  $\text{cm}^{-1}$ ): 2961, 2904, 2867, 1607, 1539, 1516, 1451, 820. LRMS (EI, 70 Ev)  $m/z$  (%): 338 ( $\text{M}^+$ , 100). HRMS (ESI) for  $\text{C}_{21}\text{H}_{26}\text{N}_2\text{S}$  ( $\text{M}+\text{H}^+$ ): calcd. 339.1890, found 339.1891.

#### 6-Methoxy-*N*-(4-methoxyphenyl)benzo[*d*]thiazol-2-amine (7) <sup>[4]</sup>

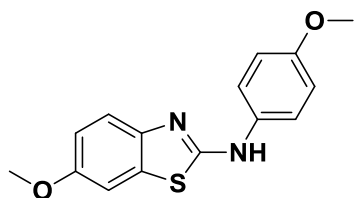

Yellow solid. (43 mg, 75% yield). M.P.: 157-159 °C.  $^1\text{H}$  NMR (500 MHz,  $\text{DMSO-}d_6$ )  $\delta$  10.09 (s, 1H), 7.71 – 7.60 (m, 2H), 7.45 (d,  $J = 8.7$  Hz, 1H), 7.40 (d,  $J = 2.7$  Hz, 1H), 6.96 – 6.92 (m, 2H), 6.90 (dd,  $J = 8.8, 2.7$  Hz, 1H), 3.76 (s, 3H), 3.73 (s, 3H).  $^{13}\text{C}$  NMR (126 MHz,  $\text{DMSO-}d_6$ )  $\delta$  160.7, 155.5, 154.9, 146.8, 134.7, 131.5, 119.8, 119.7, 114.7, 113.8, 105.8, 56.0, 55.7. IR (ATR,  $\text{cm}^{-1}$ ): 1611, 1541, 1502, 1246, 1055. LRMS (EI, 70 Ev)  $m/z$  (%): 286 ( $\text{M}^+$ , 100). HRMS (ESI) for  $\text{C}_{15}\text{H}_{15}\text{N}_2\text{O}_2\text{S}$  [ $\text{M}+\text{H}$ ] $^+$ : calcd. 287.0849, found 287.0851.

#### 6-Ethoxy-*N*-(4-ethoxyphenyl)benzo[*d*]thiazol-2-amine (8)

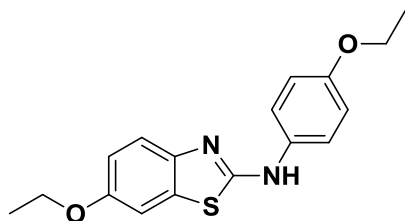

Yellow solid. (48 mg, 77% yield). M.P.: 146-148 °C.  $^1\text{H}$  NMR (500 MHz,  $\text{DMSO-}d_6$ )  $\delta$  10.08 (s, 1H), 7.65 (d,  $J = 9.0$  Hz, 2H), 7.44 (d,  $J = 8.8$  Hz, 1H), 7.38 (d,  $J = 2.6$  Hz, 1H), 6.97 – 6.90 (m, 2H), 6.88 (dd,  $J = 8.7, 2.6$  Hz, 1H), 4.01 (dq,  $J = 15.7, 7.0$  Hz, 4H), 1.33 (q,  $J = 6.7$  Hz, 6H).  $^{13}\text{C}$  NMR (126 MHz,  $\text{DMSO-}d_6$ )  $\delta$  160.2, 154.2, 153.6, 146.2, 134.1, 130.9, 119.2, 119.2, 114.7, 113.8, 106.0, 63.5, 63.1, 14.7, 14.6. IR (ATR,  $\text{cm}^{-1}$ ): 1614, 1540, 1507, 1457, 1244. LRMS (EI, 70 Ev)  $m/z$  (%): 314 ( $\text{M}^+$ , 100).

#### 6-Bromo-*N*-(4-bromophenyl)benzo[*d*]thiazol-2-amine (9)

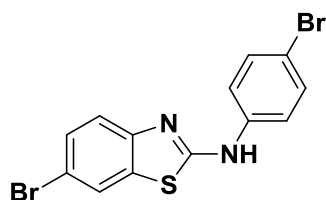

Yellow solid. (29 mg, 38% yield). M.P.: 225-227 °C.  $^1\text{H}$  NMR (500 MHz,  $\text{DMSO-}d_6$ )  $\delta$  10.72 (s, 1H), 8.08 (d,  $J = 2.0$  Hz, 1H), 7.75 (d,  $J = 8.9$  Hz, 2H), 7.56-7.52 (d,  $J = 8.9$  Hz, 3H), 7.47 (dd,  $J = 8.6, 2.1$  Hz, 1H).  $^{13}\text{C}$  NMR (126 MHz,  $\text{DMSO-}d_6$ )  $\delta$  162.5, 151.6, 140.2, 132.7, 132.3, 129.4, 124.1, 121.3, 120.3, 114.6, 114.2. IR (ATR,  $\text{cm}^{-1}$ ): 1612, 1537, 1367, 1242, 1040. LRMS (EI, 70 Ev)  $m/z$  (%): 384 ( $\text{M}^+ + 2$ , 100), 382 ( $\text{M}^+$ , 100);

#### 6-Iodo-N-(4-iodophenyl)benzo[d]thiazol-2-amine (10)

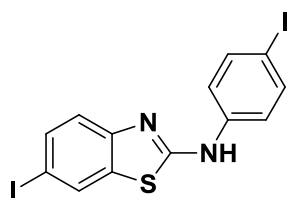

Yellow solid. (32 mg, 34% yield). M.P.: 230-231 °C.  $^1\text{H}$  NMR (500 MHz,  $\text{DMSO-}d_6$ )  $\delta$  10.67 (s, 1H), 8.20 (d,  $J = 1.8$  Hz, 1H), 7.73 – 7.65 (m, 2H), 7.65 – 7.57 (m, 3H), 7.40 (d,  $J = 8.4$  Hz, 1H).  $^{13}\text{C}$  NMR (126 MHz,  $\text{DMSO-}d_6$ )  $\delta$  162.2, 152.0, 140.6, 138.0, 135.0, 133.0, 129.7, 121.7, 120.6, 85.9, 85.7. IR (ATR,  $\text{cm}^{-1}$ ): 1608, 1530, 1479, 1434, 1245, 1047. LRMS (EI, 70 Ev)  $m/z$  (%): 478 ( $\text{M}^+$ , 100). HRMS (ESI) for  $\text{C}_{13}\text{H}_9\text{I}_2\text{N}_2\text{S}$  ( $\text{M} + \text{H}^+$ ): calcd. 478.8570, found 478.8564.

#### 4-Methyl-N-(*o*-tolyl)benzo[d]thiazol-2-amine (12) <sup>[5]</sup>

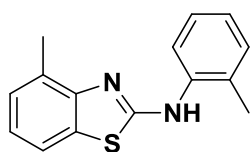

Yellow solid. (42 mg, 82% yield). M.P.: 131-133 °C.  $^1\text{H}$  NMR (500 MHz,  $\text{DMSO-}d_6$ )  $\delta$  9.65 (s, 1H), 7.90 (d,  $J = 8.0$  Hz, 1H), 7.54 (d,  $J = 7.7$  Hz, 1H), 7.25 (td,  $J = 7.6, 5.9$  Hz, 2H), 7.15 – 7.06 (m, 2H), 7.00 (t,  $J = 7.6$  Hz, 1H), 2.48 (s, 3H), 2.30 (s, 3H).  $^{13}\text{C}$  NMR (126 MHz,  $\text{DMSO-}d_6$ )  $\delta$  164.1, 151.5, 139.4, 131.2, 131.0, 130.2, 128.4, 127.1, 126.8, 125.1, 123.4, 122.1, 118.9, 18.6, 18.5. IR (ATR,  $\text{cm}^{-1}$ ): 1558, 1540, 1456, 1258, 755. LRMS (EI, 70 Ev)  $m/z$  (%): 254 ( $\text{M}^+$ , 100).

#### 4-Methoxy-N-(2-methoxyphenyl)benzo[d]thiazol-2-amine (13) <sup>[6]</sup>

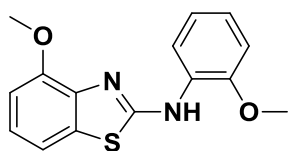

White solid. (36 mg, 63% yield). M.P.: 147-148 °C.  $^1\text{H}$  NMR (500 MHz,  $\text{CDCl}_3$ )  $\delta$  8.07 (br, 1H), 7.99 – 7.89 (m, 1H), 7.29 (d,  $J = 7.4$  Hz, 1H), 7.15 (t,  $J = 8.0$  Hz, 1H), 7.10 – 7.01 (m, 2H), 6.98 – 6.89 (m, 1H), 6.88 (d,  $J = 8.0$  Hz, 1H), 4.03 (s, 3H), 3.90 (s, 3H).  $^{13}\text{C}$  NMR (126 MHz,  $\text{CDCl}_3$ )  $\delta$  161.7, 151.0, 148.1, 140.9, 131.3, 129.3, 123.0, 123.0, 121.0, 117.0, 113.0, 110.4, 107.2, 55.9, 55.7. IR (ATR,  $\text{cm}^{-1}$ ): 1623, 1541, 1462, 1257, 1046, 736. LRMS (EI, 70 Ev)  $m/z$  (%): 286 ( $\text{M}^+$ , 100).

#### 4-Methylthio-*N*-[3-(methylthio)phenyl]benzo[*d*]thiazol-2-amine (14)

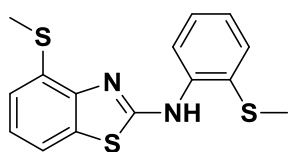

Yellow oil. (49 mg, 77% yield).  $^1\text{H}$  NMR (500 MHz,  $\text{DMSO}-d_6$ )  $\delta$  9.88 (s, 1H), 7.89 – 7.64 (m, 1H), 7.51 (dd,  $J = 6.8, 2.1$  Hz, 1H), 7.39 (dd,  $J = 6.9, 2.4$  Hz, 1H), 7.30 – 7.21 (m, 2H), 7.15 – 7.02 (m, 2H), 2.46 (d,  $J = 5.0$  Hz, 3H), 2.42 (d,  $J = 5.0$  Hz, 3H).  $^{13}\text{C}$  NMR (126 MHz,  $\text{DMSO}-d_6$ )  $\delta$  165.5, 148.9, 138.1, 134.1, 130.2, 128.9, 127.8, 127.0, 126.4, 125.6, 122.8, 121.7, 117.6, 15.7, 14.5. IR (ATR,  $\text{cm}^{-1}$ ): 1613, 1538, 1454, 1249, 1049. LRMS (EI, 70 Ev)  $m/z$  (%): 318 ( $\text{M}^+$ , 100); HRMS (ESI) for  $\text{C}_{15}\text{H}_{15}\text{N}_2\text{S}_3$  ( $\text{M}+\text{H}^+$ ): calcd. 319.0383, found 319.0375.

#### *N*-(Biphenyl-2-yl)-4-phenylbenzo[*d*]thiazol-2-amine (15)

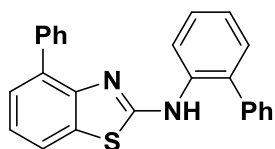

Gray oil. (63 mg, 83% yield).  $^1\text{H}$  NMR (500 MHz,  $\text{CDCl}_3$ )  $\delta$  8.23 (dd,  $J = 8.2, 1.1$  Hz, 1H), 7.88 (dd,  $J = 8.2, 1.3$  Hz, 2H), 7.64 (dd,  $J = 7.9, 1.2$  Hz, 1H), 7.54 – 7.46 (m, 5H), 7.46 – 7.37 (m, 5H), 7.34 (dd,  $J = 7.6, 1.7$  Hz, 1H), 7.30 – 7.27 (m, 1H), 7.24 (td,  $J = 7.5, 1.2$  Hz, 1H).  $^{13}\text{C}$  NMR (126 MHz,  $\text{CDCl}_3$ )  $\delta$  162.8, 149.4, 139.4, 138.0, 137.0, 132.9, 131.4, 130.6, 129.4, 129.3, 129.1, 128.6, 128.1, 127.8, 127.2, 126.5, 124.1, 122.7, 120.4, 119.8. IR (ATR,  $\text{cm}^{-1}$ ): 1609, 1544, 1379, 1266, 1037. LRMS (EI, 70 Ev)  $m/z$  (%): 378 ( $\text{M}^+$ , 100). HRMS (ESI) for  $\text{C}_{25}\text{H}_{19}\text{N}_2\text{S}$  ( $\text{M}+\text{H}^+$ ): calcd. 379.1263, found 379.1271.

#### 6-Chloro-*N*-(4-chloro-2-methylphenyl)-4-methylbenzo[*d*]thiazol-2-amine (16)

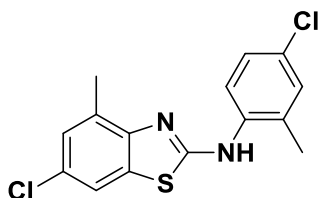

Yellow solid. (43 mg, 67% yield). M.P.: 189-191 °C.  $^1\text{H}$  NMR (500 MHz,  $\text{DMSO-}d_6$ )  $\delta$  9.78 (s, 1H), 8.04 (d,  $J$  = 8.6 Hz, 1H), 7.71 (d,  $J$  = 2.2 Hz, 1H), 7.34 (d,  $J$  = 2.3 Hz, 1H), 7.29 (dd,  $J$  = 8.7, 2.5 Hz, 1H), 7.17 (d,  $J$  = 2.1 Hz, 1H), 2.46 (s, 3H), 2.29 (s, 3H).  $^{13}\text{C}$  NMR (126 MHz,  $\text{DMSO-}d_6$ )  $\delta$  163.9, 150.2, 138.1, 132.7, 131.8, 130.6, 130.3, 128.3, 126.8, 126.8, 126.1, 124.2, 118.6, 18.4, 18.3. IR (ATR,  $\text{cm}^{-1}$ ): 1627, 1538, 1451, 1257, 1046. LRMS (EI, 70 Ev)  $m/z$  (%): 322 ( $\text{M}^+$ , 100). HRMS (ESI) for  $\text{C}_{15}\text{H}_{13}\text{Cl}_2\text{N}_2\text{S}$  ( $\text{M}+\text{H}^+$ ): calcd. 323.0171, found 323.0172.

### 6-Bromo-*N*-(4-bromo-2-methylphenyl)-4-methylbenzo[*d*]thiazol-2-amine (17)

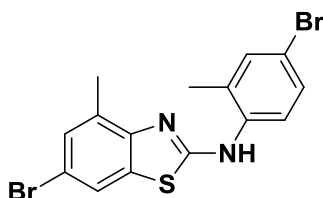

White solid. (54 mg, 66% yield). M.P.: 202-204 °C.  $^1\text{H}$  NMR (500 MHz,  $\text{DMSO-}d_6$ )  $\delta$  9.77 (s, 1H), 7.98 (d,  $J$  = 8.6 Hz, 1H), 7.83 (d,  $J$  = 2.3 Hz, 1H), 7.47 (d,  $J$  = 2.5 Hz, 1H), 7.43 – 7.36 (m, 1H), 7.30 (d,  $J$  = 2.2 Hz, 1H), 2.46 (s, 3H), 2.29 (s, 3H).  $^{13}\text{C}$  NMR (126 MHz,  $\text{DMSO-}d_6$ )  $\delta$  163.8, 150.5, 138.5, 133.5, 133.0, 132.2, 130.7, 129.7, 129.5, 124.5, 121.4, 116.5, 113.9, 18.3, 18.2. IR (ATR,  $\text{cm}^{-1}$ ): 1602, 1536, 1439, 1255, 1182. LRMS (EI, 70 Ev)  $m/z$  (%): 411 ( $\text{M}^++2$ , 100), 409 ( $\text{M}^+$ , 100). HRMS (ESI) for  $\text{C}_{15}\text{H}_{12}\text{Br}_2\text{N}_2\text{S}$  ( $\text{M}+\text{H}^+$ ): calcd. 409.9088, found 409.9092.

### *N*-(2,4-dimethylphenyl)-4,6-dimethylbenzo[*d*]thiazol-2-amine (18)

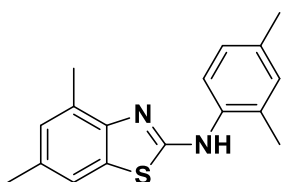

Gray solid. (27 mg, 47% yield). M.P.: 190-192 °C.  $^1\text{H}$  NMR (500 MHz,  $\text{CDCl}_3$ )  $\delta$  7.71 (br, 1H), 7.47 (d,  $J$  = 7.8 Hz, 1H), 7.20 (d,  $J$  = 1.6 Hz, 1H), 7.11 – 7.03 (m, 2H), 6.94 (s, 1H), 2.48 (s, 3H), 2.35 (d,  $J$  = 1.6 Hz, 6H), 2.28 (s, 3H).  $^{13}\text{C}$  NMR (126 MHz,  $\text{CDCl}_3$ )  $\delta$  165.8, 148.8, 136.1, 135.9, 132.4, 131.9, 131.6, 130.2, 128.3, 128.1, 127.7, 124.4, 118.2, 21.2, 21.0, 18.2, 17.7. IR (ATR,  $\text{cm}^{-1}$ ): 2915, 2843, 1634, 1558, 1540, 1475, 1258, 1047, 799. LRMS (EI, 70 Ev)  $m/z$  (%): 282 ( $\text{M}^+$ , 100). HRMS (ESI) for  $\text{C}_{17}\text{H}_{19}\text{N}_2\text{S}$  ( $\text{M}+\text{H}^+$ ): calcd. 283.1263, found 283.1268.



***N*-(2-Bromo-4,6-dimethylphenyl)-4,6-dimethylbenzo[*d*]thiazol-2-amine (19)**

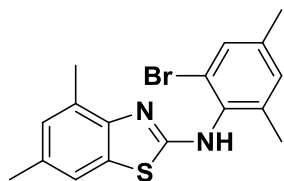

Yellow solid. (9 mg, 13% yield). M.P.: 229-230 °C. <sup>1</sup>H NMR (500 MHz, CDCl<sub>3</sub>) δ 7.37 (d, *J* = 2.0 Hz, 1H), 7.17 (s, 1H), 7.07 (s, 1H), 6.91 (s, 1H), 2.39 (s, 3H), 2.35 (d, *J* = 4.5 Hz, 6H), 2.33 (s, 3H). <sup>13</sup>C NMR (126 MHz, CDCl<sub>3</sub>) δ 167.2, 149.0, 139.6, 139.2, 134.8, 131.7, 131.4, 131.3, 130.4, 128.3, 128.1, 124.6, 118.4, 21.1, 20.9, 18.9, 18.2. IR (ATR, cm<sup>-1</sup>): 2916, 2851, 1582, 1472, 840, 833, 741, 690. LRMS (EI, 70 Ev) *m/z* (%): 362 (M<sup>+</sup>+2, 100), 360 (M<sup>+</sup>, 100). HRMS (ESI) for C<sub>17</sub>H<sub>17</sub>BrN<sub>2</sub>S (M+H<sup>+</sup>): calcd. 361.0369, found 361.0373.

***N*-(2,5-dimethylphenyl)-4,7-dimethylbenzo[*d*]thiazol-2-amine (20)**

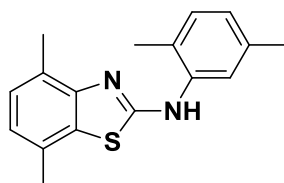

Gray solid. (40 mg, 71% yield). M.P.: 139-141 °C. <sup>1</sup>H NMR (500 MHz, CDCl<sub>3</sub>) δ 7.50 (s, 1H), 7.19 (d, *J* = 7.7 Hz, 1H), 7.08 (d, *J* = 7.5 Hz, 1H), 7.03 (dd, *J* = 7.8, 2.2 Hz, 1H), 6.87 (d, *J* = 7.5 Hz, 1H), 2.53 (s, 3H), 2.40 (s, 6H), 2.32 (s, 3H). <sup>13</sup>C NMR (126 MHz, CDCl<sub>3</sub>) δ 165.8, 150.4, 138.2, 137.0, 131.0, 130.3, 128.9, 128.2, 126.9, 126.9, 126.1, 124.6, 122.5, 21.1, 21.0, 18.0, 17.4. IR (ATR, cm<sup>-1</sup>): 2914, 2840, 1611, 1551, 1232, 813, 795. LRMS (EI, 70 Ev) *m/z* (%): 282 (M<sup>+</sup>, 100). HRMS (ESI) for C<sub>17</sub>H<sub>18</sub>N<sub>2</sub>S (M+H<sup>+</sup>): calcd. 283.1264, found 283.1266.

***N*-(2,5-dimethylphenyl)-4,7-dimethylbenzo[*d*]thiazol-2-amine (21)**

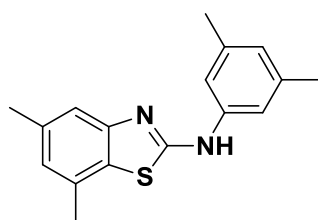

White solid. (48 mg, 85% yield). M.P.: 187-189 °C. <sup>1</sup>H NMR (500 MHz, CDCl<sub>3</sub>) δ 7.24 (s, 1H), 7.12 (s, 2H), 6.81 (d, *J* = 11.2 Hz, 2H), 2.43 (s, 3H), 2.38 (s, 3H), 2.36 (s, 6H). <sup>13</sup>C NMR (126 MHz, CDCl<sub>3</sub>) δ 165.2, 151.3, 140.0, 139.3, 136.0, 130.4, 127.0, 126.1, 124.1, 118.3, 118.2, 117.2, 21.4, 21.4, 21.1. IR (ATR, cm<sup>-1</sup>): 2916, 2851, 1581, 1471, 840, 741. LRMS (EI, 70 Ev) *m/z* (%): 282 (M<sup>+</sup>, 100). HRMS (ESI) for C<sub>17</sub>H<sub>18</sub>N<sub>2</sub>S (M+H<sup>+</sup>): calcd. 283.1264, found 283.1264.

***N*-(Naphthalen-1-yl)naphtho[1,2-*d*]thiazol-2-amine (22) [4]**

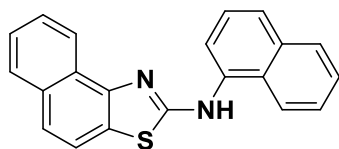

White solid. (50 mg, 77% yield). M.P.: 182-185 °C.  $^1\text{H}$  NMR (500 MHz,  $\text{CDCl}_3$ )  $\delta$  8.51 (dd,  $J = 8.3, 1.1$  Hz, 1H), 8.19 (dd,  $J = 8.4, 1.3$  Hz, 1H), 7.98 – 7.88 (m, 2H), 7.84 (dd,  $J = 13.9, 8.3$  Hz, 2H), 7.65 – 7.42 (m, 6H), 7.37 (ddd,  $J = 8.2, 6.8, 1.3$  Hz, 1H).  $^{13}\text{C}$  NMR (126 MHz,  $\text{CDCl}_3$ )  $\delta$  167.9, 147.5, 135.9, 134.7, 132.2, 128.7, 128.7, 128.0, 126.9, 126.8, 126.7, 126.7, 126.0, 125.9, 125.5, 125.2, 123.7, 122.6, 121.7, 121.2, 118.7. IR (ATR,  $\text{cm}^{-1}$ ): 1615, 1543, 1245, 1043. LRMS (EI, 70 Ev)  $m/z$  (%): 326 ( $\text{M}^+$ , 100).

### 6-Methyl-N-(4-nitrophenyl)benzo[d]thiazol-2-amine (23) <sup>[7]</sup>

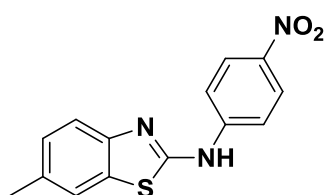

Yellow solid. (15 mg, 27% yield). M.P.: 249-251 °C.  $^1\text{H}$  NMR (500 MHz,  $\text{DMSO}-d_6$ )  $\delta$  11.16 (s, 1H), 8.27 (d,  $J = 9.2$  Hz, 2H), 7.99 (d,  $J = 9.2$  Hz, 2H), 7.69 (s, 1H), 7.60 (d,  $J = 8.2$  Hz, 1H), 7.21 (dd,  $J = 8.3, 1.7$  Hz, 1H), 2.39 (s, 3H).  $^{13}\text{C}$  NMR (126 MHz,  $\text{DMSO}-d_6$ )  $\delta$  159.8, 149.3, 146.5, 140.8, 132.7, 130.4, 129.5, 127.3, 125.4, 121.1, 119.7, 117.0, 20.9. IR (ATR,  $\text{cm}^{-1}$ ): 1612, 1538, 1502, 1323, 1257. LRMS (EI, 70 Ev)  $m/z$  (%): 285 ( $\text{M}^+$ , 100).

### (E) Reference

- [1] M. J. Frisch, G. W. Trucks, H. B. Schlegel, *et al.* Gaussian 09, rev. D. 01. Wallingford, CT: Gaussian, Inc. **2009**.
- [2] A. D. Becke, *J. Chem. Phys.* **1993**, *98*, 5648–52.
- [3] J. Tomasi, B. Mennucci, R. Cammi, *Chem. Rev.* **2005**, *105*, 2999–3093.
- [4] Y. Xu, B. Li, X. Zhang, X. Fan, *J. Org. Chem.* **2017**, *82*, 9637-9646.
- [5] Y. He, J. Li, S. Luo, J. Huang, Q. Zhu, *Chem. Commun.* **2016**, *52*, 8444-8447.
- [6] L. Nahakpam, B.S. Chingakham, W.S. Laitonjam, *J. Heterocyclic Chem.* **2015**, *52*, 267-272.
- [7] Q. Ding, B. Cao, X. Liu, Z. Zong, Y.-Y. Peng, *Green Chem.* **2010**, *12*, 1607-1610.

(F) Spectra

*N*-Phenylbenzo[*d*]thiazol-2-amine (2)

7.6433  
7.6412  
7.6278  
7.6254  
7.5729  
7.5705  
7.5565  
7.5542  
7.5255  
7.5228  
7.5189  
7.5122  
7.5103  
7.5081  
7.5059  
7.4345  
7.4303  
7.4198  
7.4174  
7.4064  
7.4028  
7.3443  
7.3418  
7.3296  
7.3280  
7.3135  
7.3110  
7.2064  
7.2040  
7.2016  
7.1918  
7.1893  
7.1866  
7.1770  
7.1744  
7.1719  
7.1590  
7.1567  
7.1438  
7.1415

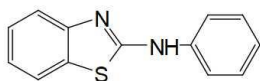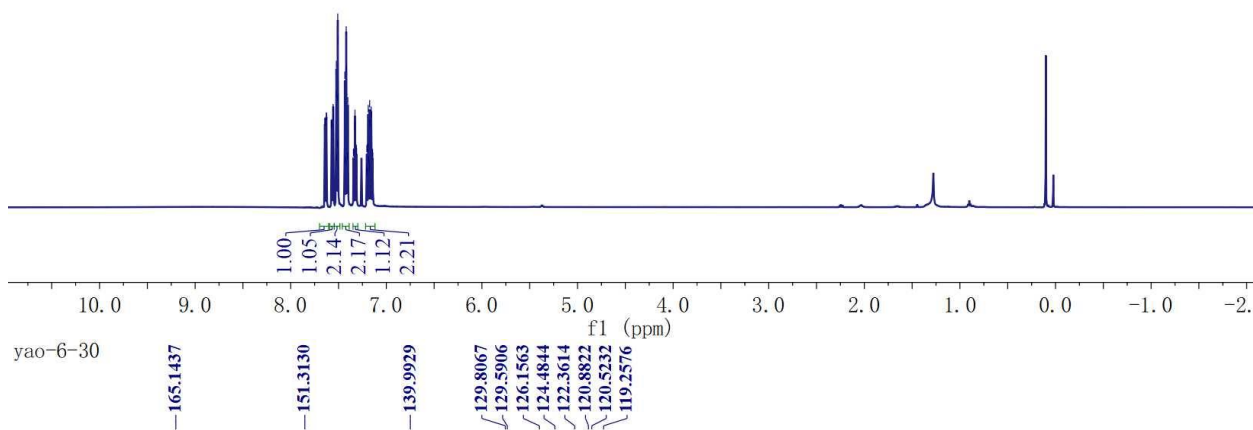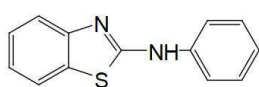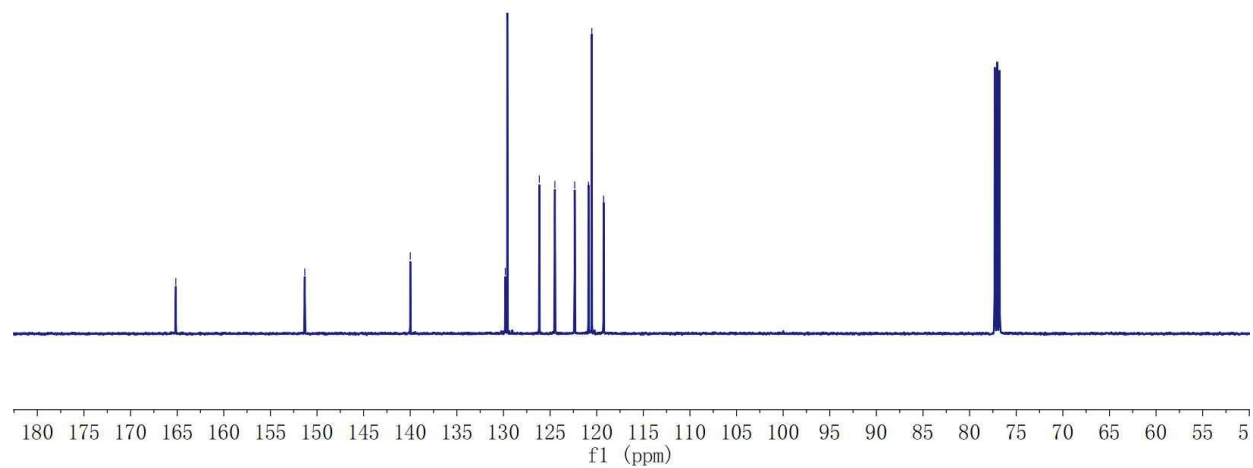

### 6-Methyl-N-p-tolylbenzo[d]thiazol-2-amine (3)

yao-7-1-a

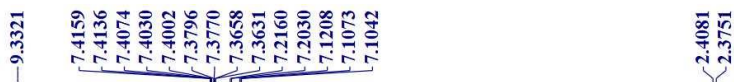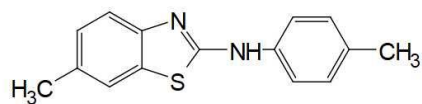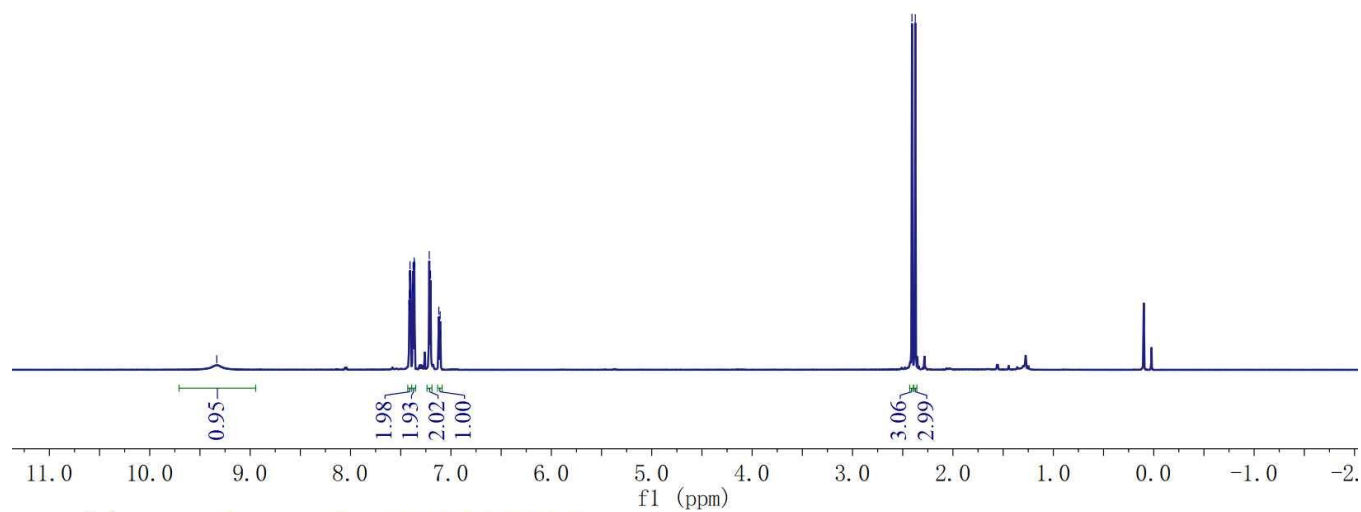

yao-7-1-a

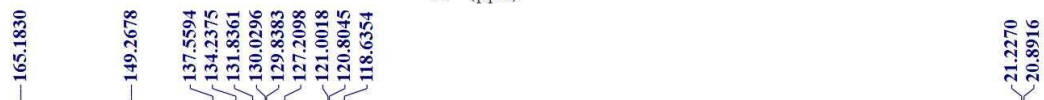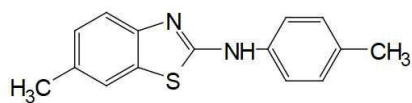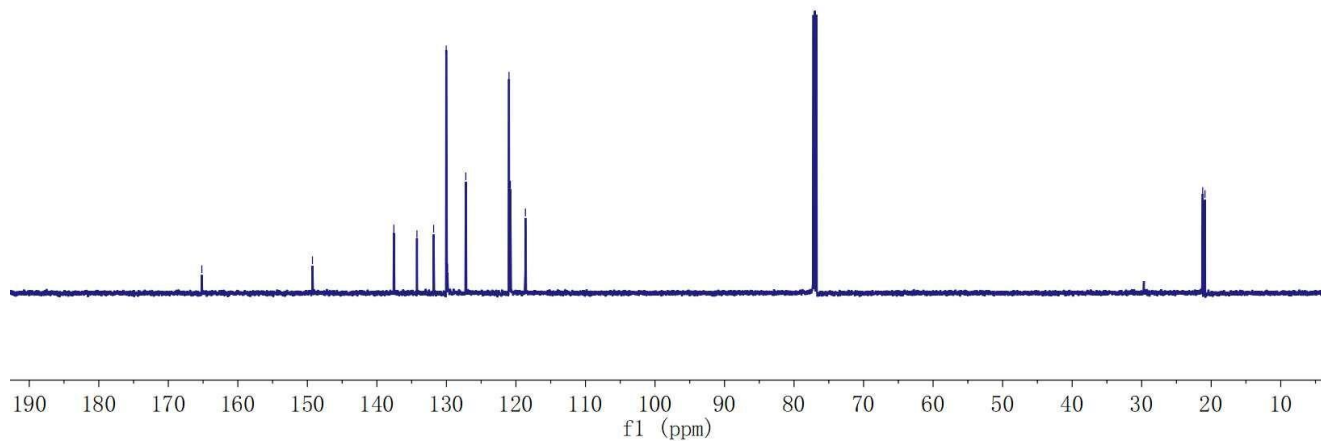

6-Ethyl-N-(4-ethylphenyl)benzo[d]thiazol-2-amine (4)

yao-7-1-c

10.2814

7.6885  
7.6715  
7.6233  
7.6029  
7.4951  
7.4787  
7.1956  
7.1788  
7.1608  
7.1572  
7.1442  
7.1406

2.6751  
2.6599  
2.6448  
2.6295  
2.5935  
2.5781  
2.5631  
2.5493  
1.2229  
1.2078  
1.1922  
1.1766  
1.1615

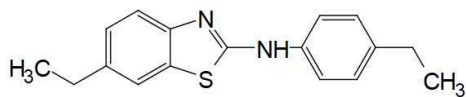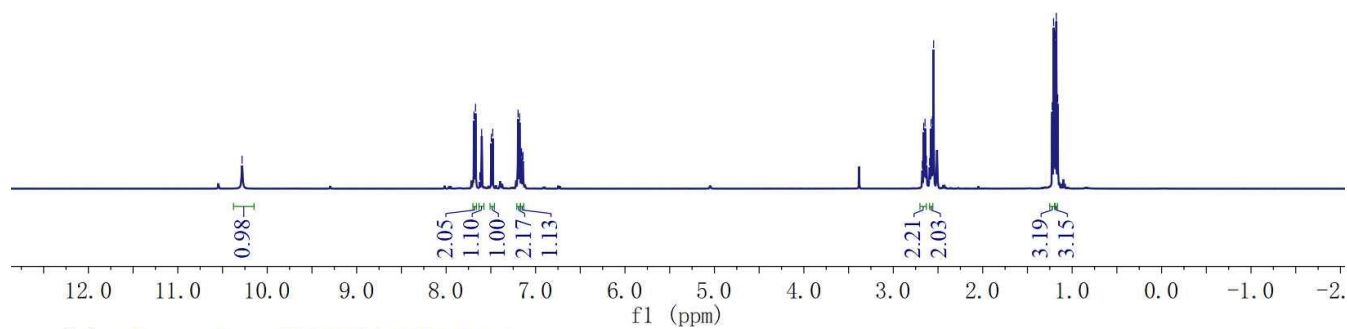

yao-7-1-c

161.0320

150.2612

138.4822  
137.8847  
137.5239  
130.0088  
128.2137  
128.0978  
125.7283  
119.6798  
118.7506  
118.0633  
117.8392

28.0129  
27.5516

15.9575  
15.7406

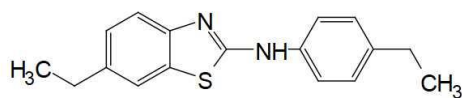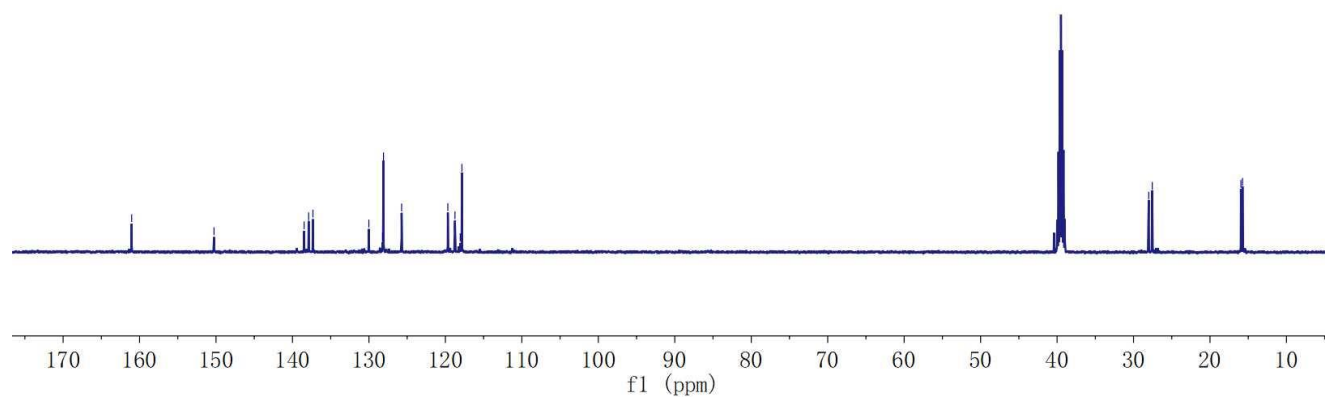

### 6-Butyl-N-(4-butylphenyl)benzo[d]thiazol-2-amine (5)

yao-7-2-a

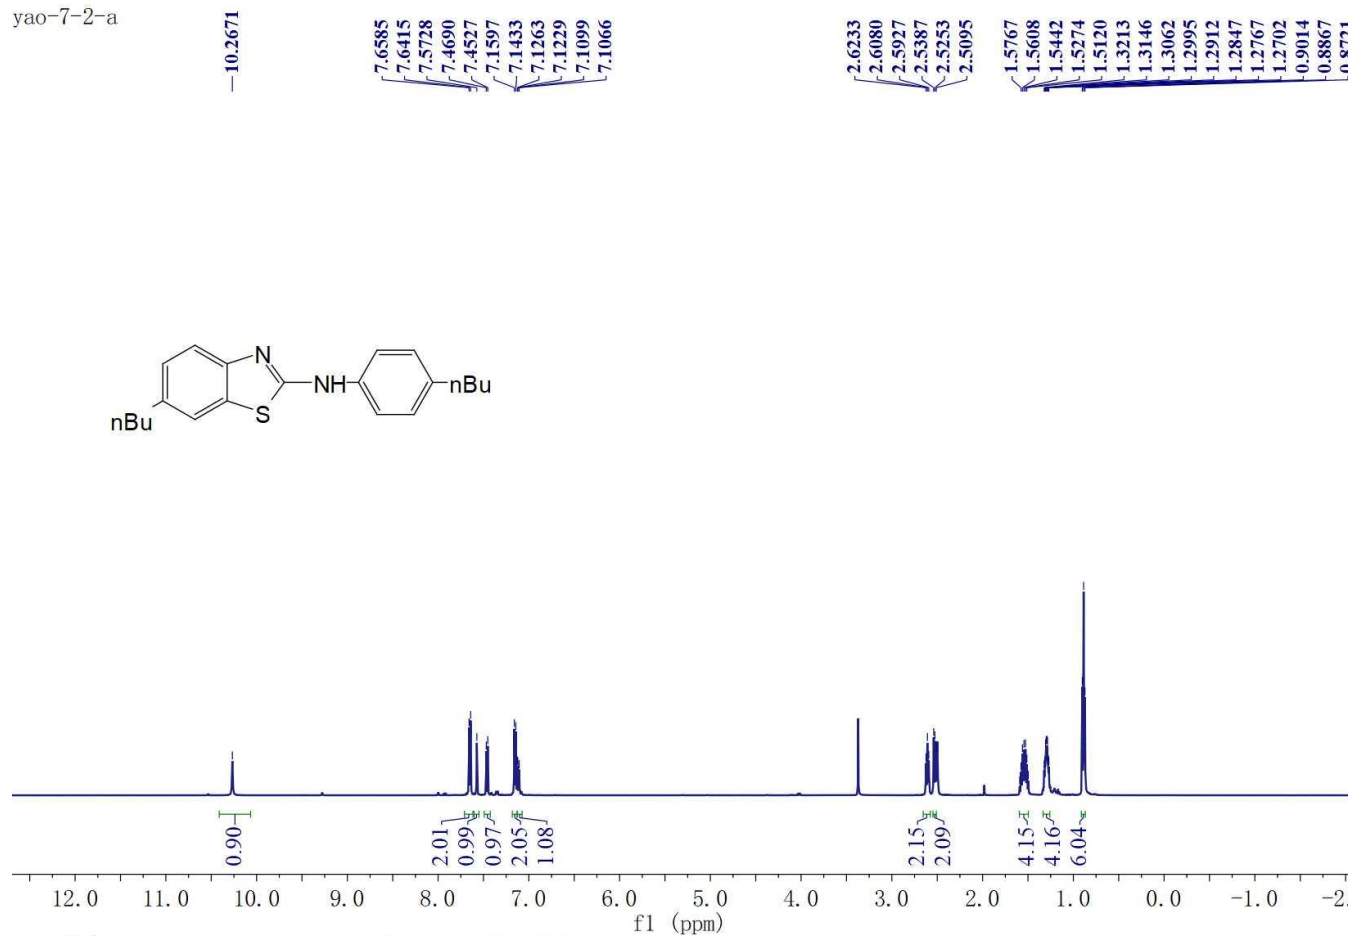

yao-7-2-a

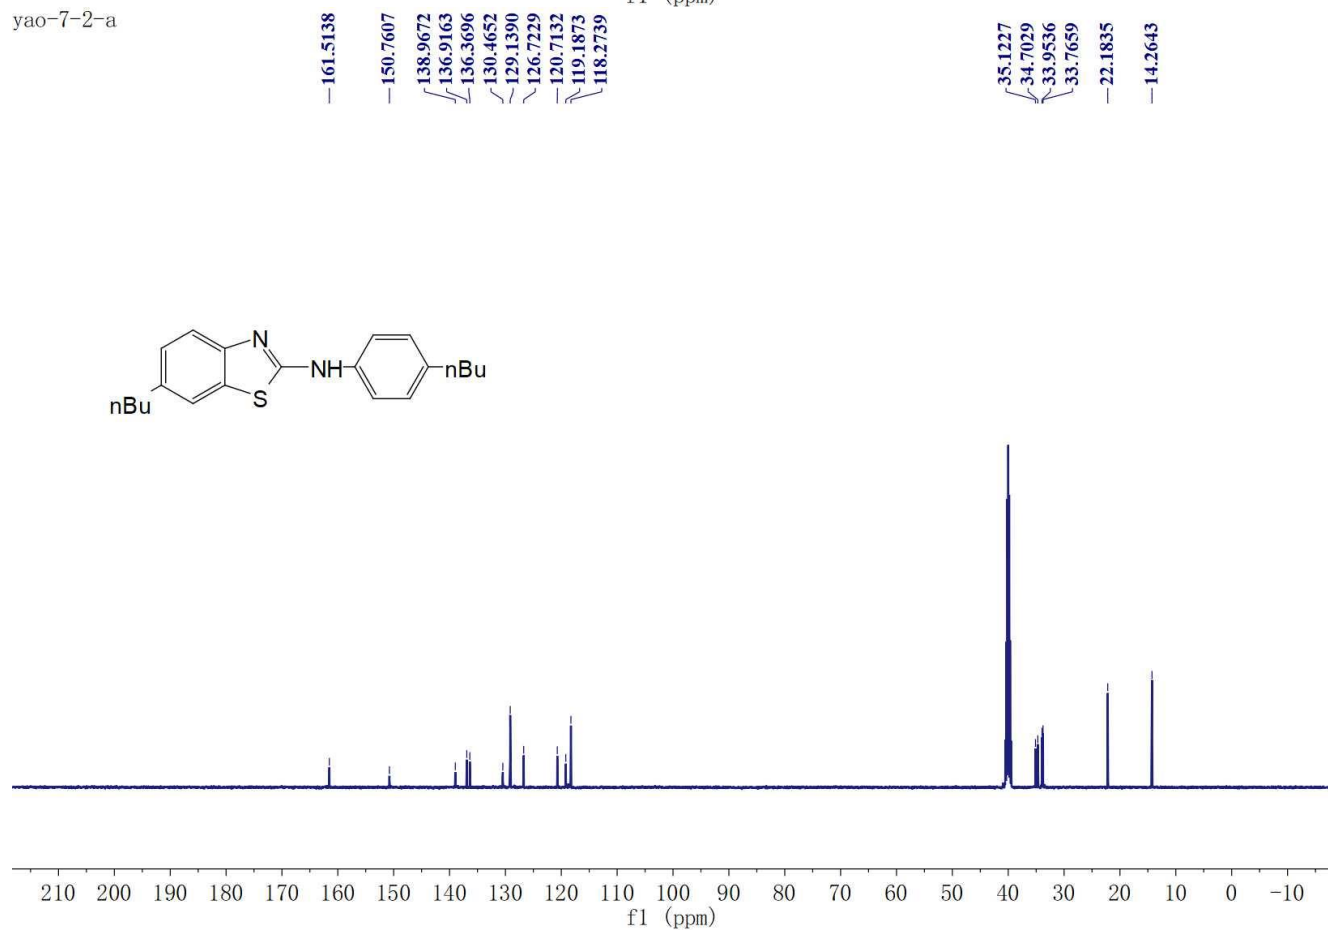

6-(tert-Butyl)-N-[4-(tert-butyl)phenyl]benzo[d]thiazol-2-amine (6)

yao-7-2-e

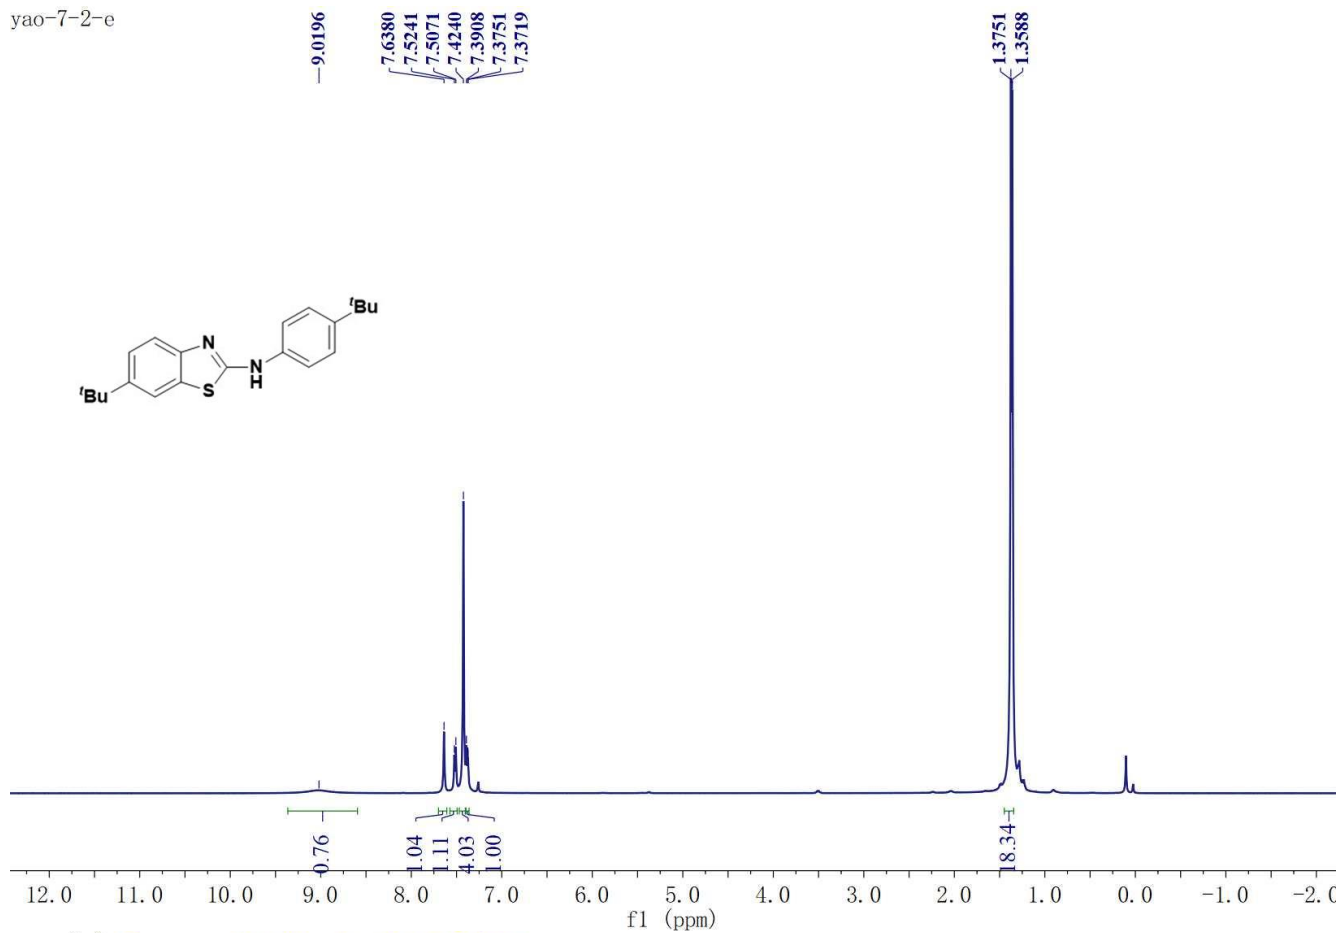

yao-7-2-f

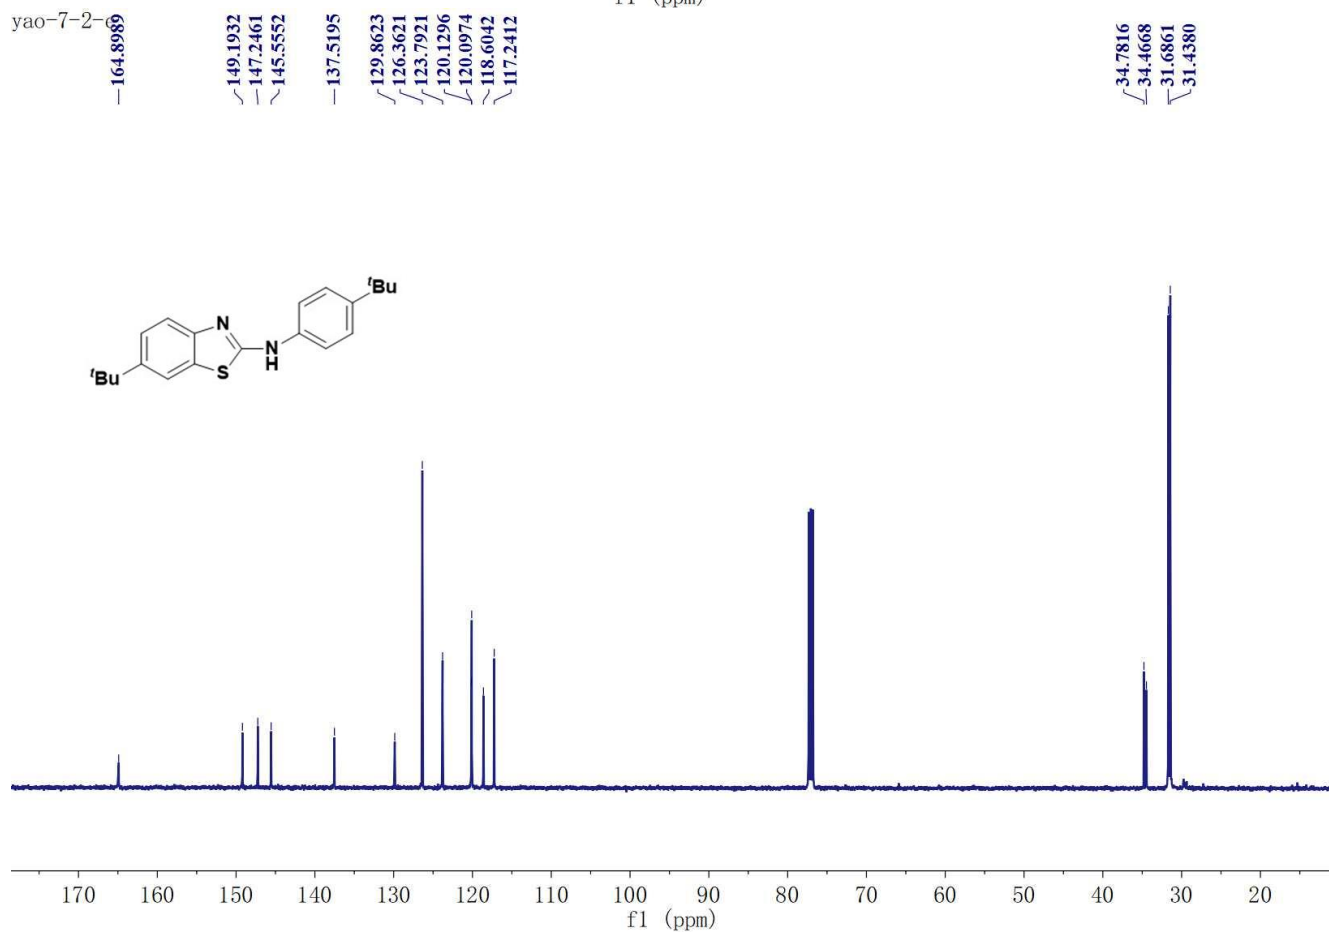

**6-Methoxy-N-(4-methoxyphenyl)benzo[d]thiazol-2-amine (7)**

yao-8-30

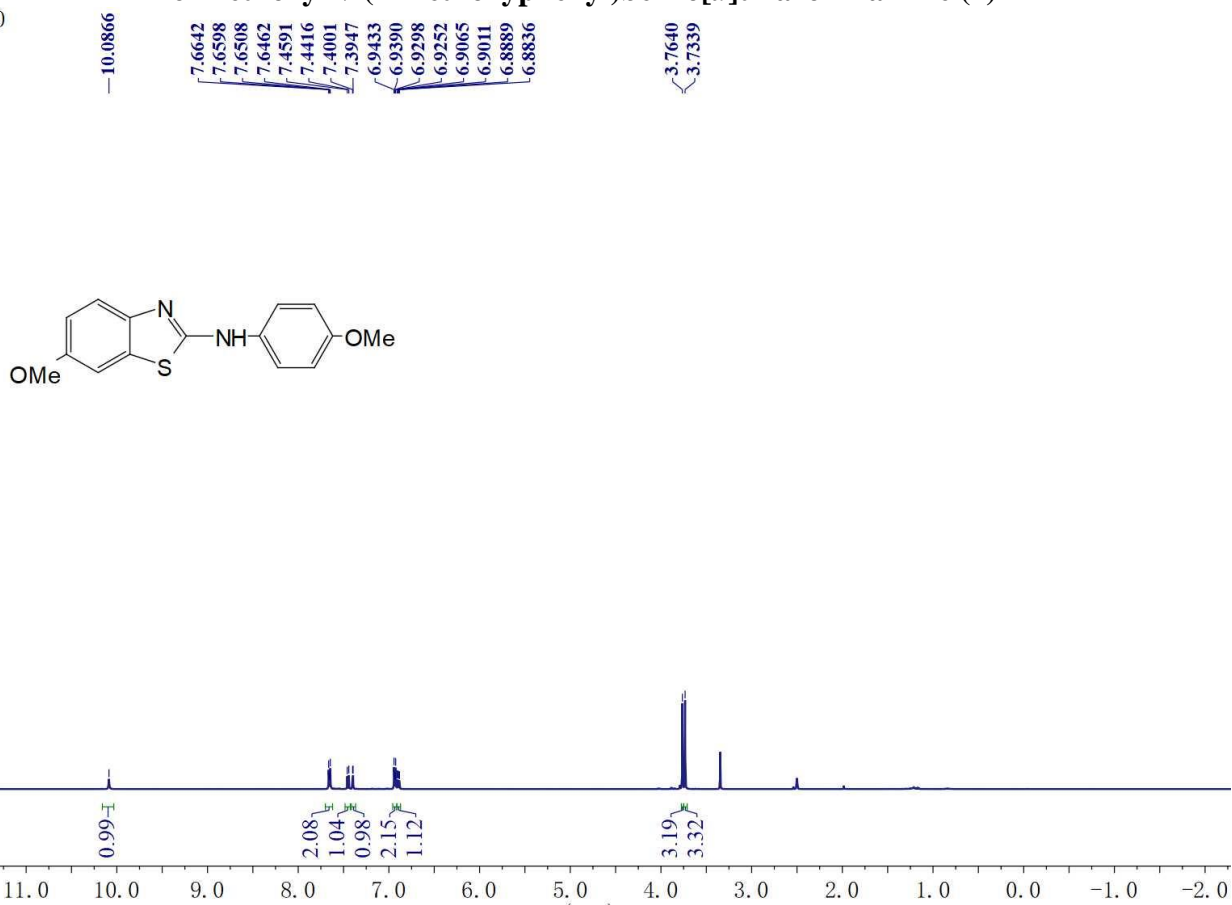

yao-8-30

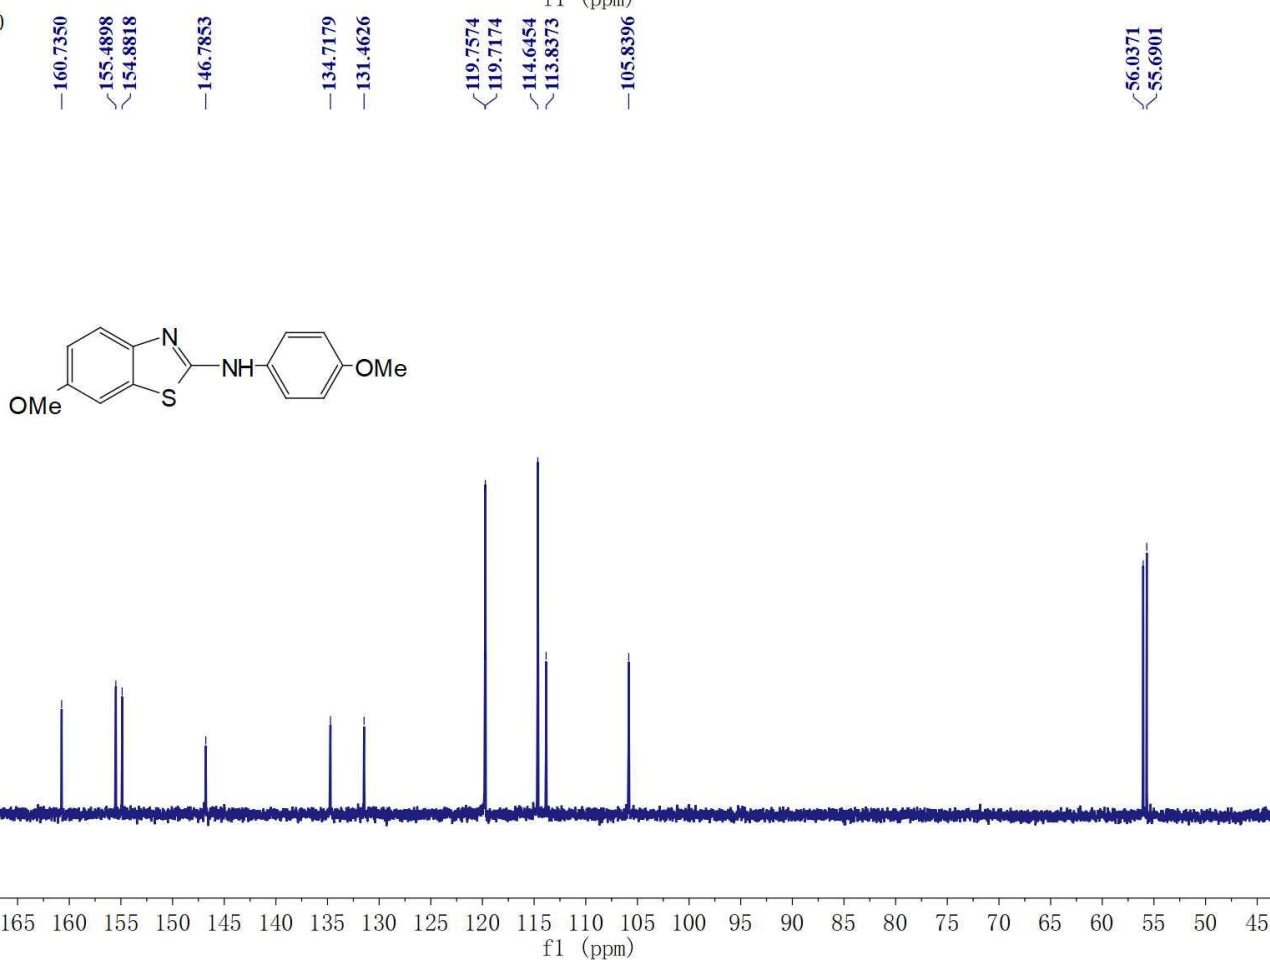



# 6-Ethoxy-N-(4-ethoxyphenyl)benzo[d]thiazol-2-amine (8)

yao-7-15-b

10.0814

7.6567  
7.6388  
7.4519  
7.4343  
7.3838  
7.3785  
6.9321  
6.9277  
6.9186  
6.9141  
6.8958  
6.8906  
6.8785  
6.8732

4.0444  
4.0423  
4.0303  
4.0165  
4.0132  
4.0027  
3.9991  
3.9852  
3.9713

1.3474  
1.3339  
1.3209  
1.3074

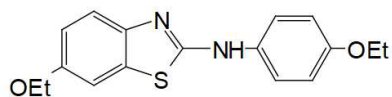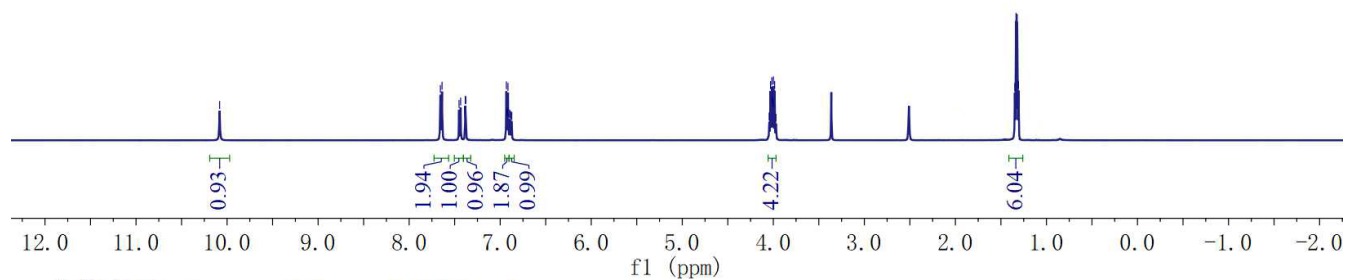

yao-7-

160.1884  
154.1922  
153.6183

146.2322

134.1340  
130.9288

119.2389  
119.1775  
114.6875  
113.8143

105.9760

63.5309  
63.1220

14.7075  
14.6842

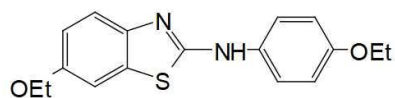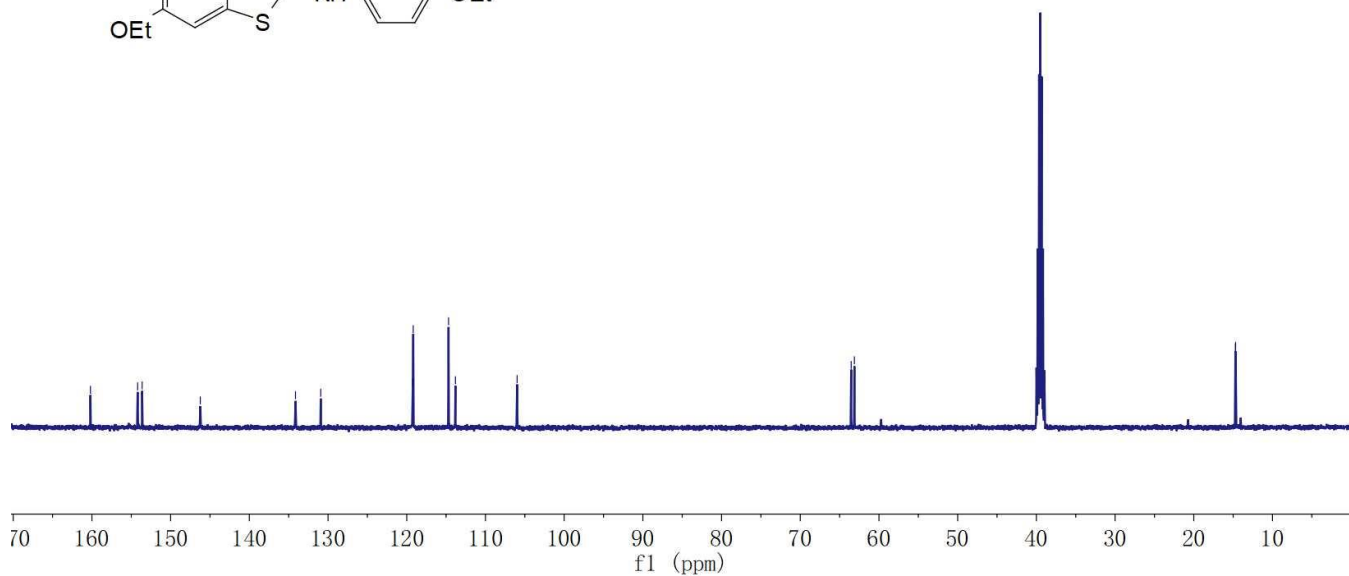

# 6-Bromo-N-(4-bromophenyl)benzo[d]thiazol-2-amine (9)

yao-7-6-a

10.7168

8.0775  
8.0735  
7.7540  
7.7363  
7.5545  
7.5474  
7.5347  
7.5298  
7.4777  
7.4735  
7.4605  
7.4564

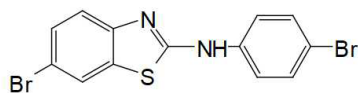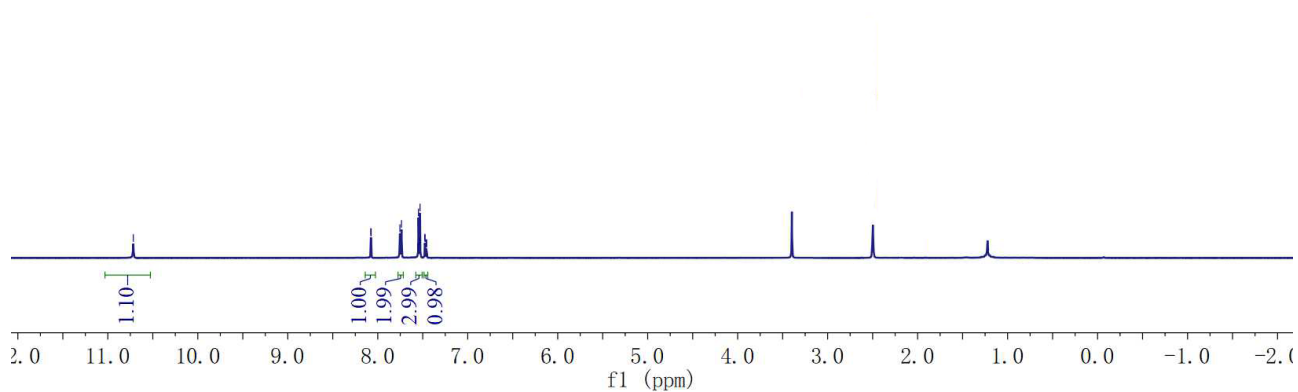

yao-7-6-a

162.4764

151.6365

140.1661

132.7221

132.2861

129.4157

124.1406

121.3310

120.2994

114.5765

114.1601

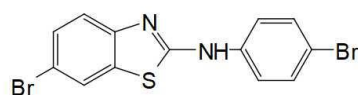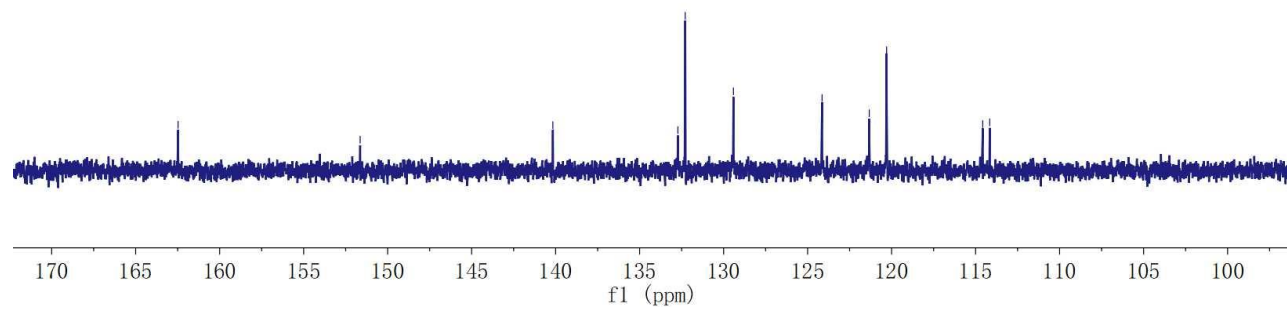

# 6-Iodo-N-(4-iodophenyl)benzo[d]thiazol-2-amine (10)

yao-7-6-e

10.6689

8.2030  
8.1994  
7.7009  
7.6952  
7.6911  
7.6818  
7.6775  
7.6719  
7.6240  
7.6200  
7.6155  
7.6070  
7.6029  
7.4126  
7.3958

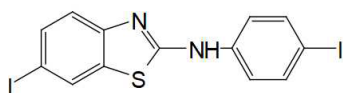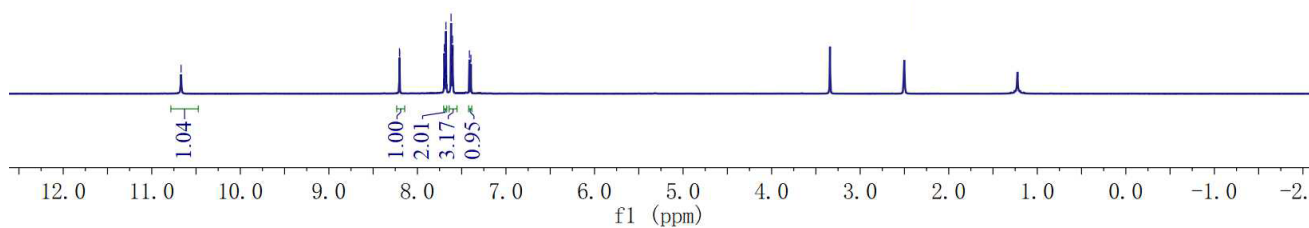

yao-7-6-e

162.1803

151.9728

140.5802

138.0135

134.9969

133.0174

129.6530

121.7133

120.5776

85.8495

85.6476

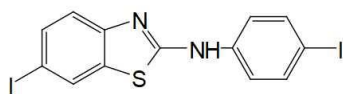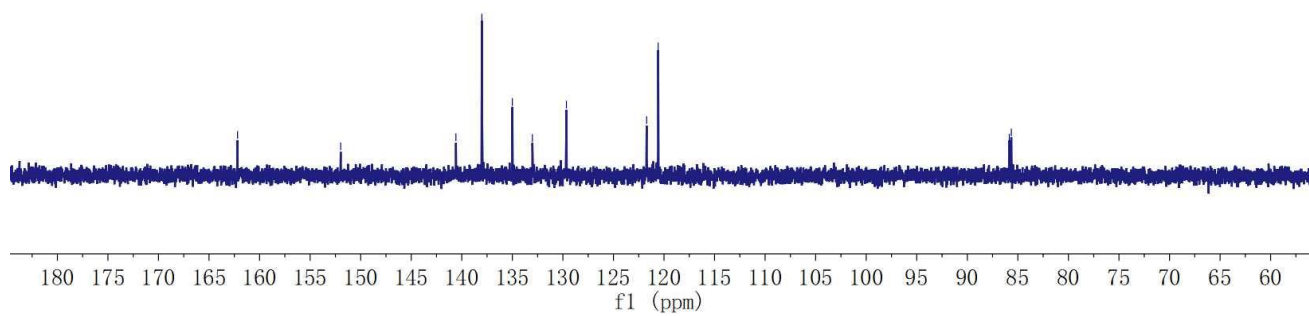

### 4-Methyl-N-(*o*-tolyl)benzo[*d*]thiazol-2-amine (12)

yao-7-16-b

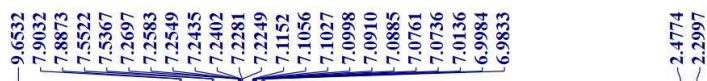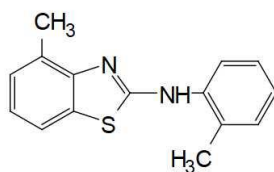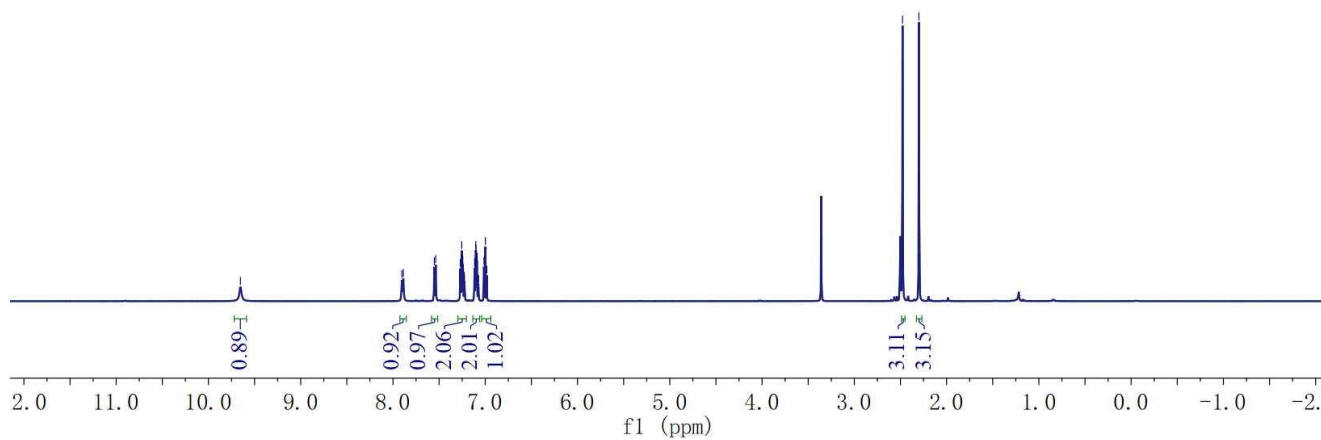

yao-7-16-b

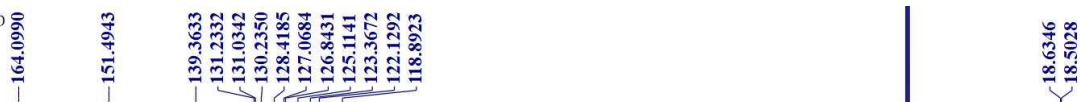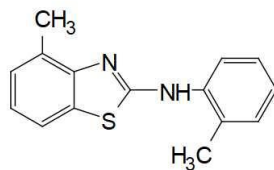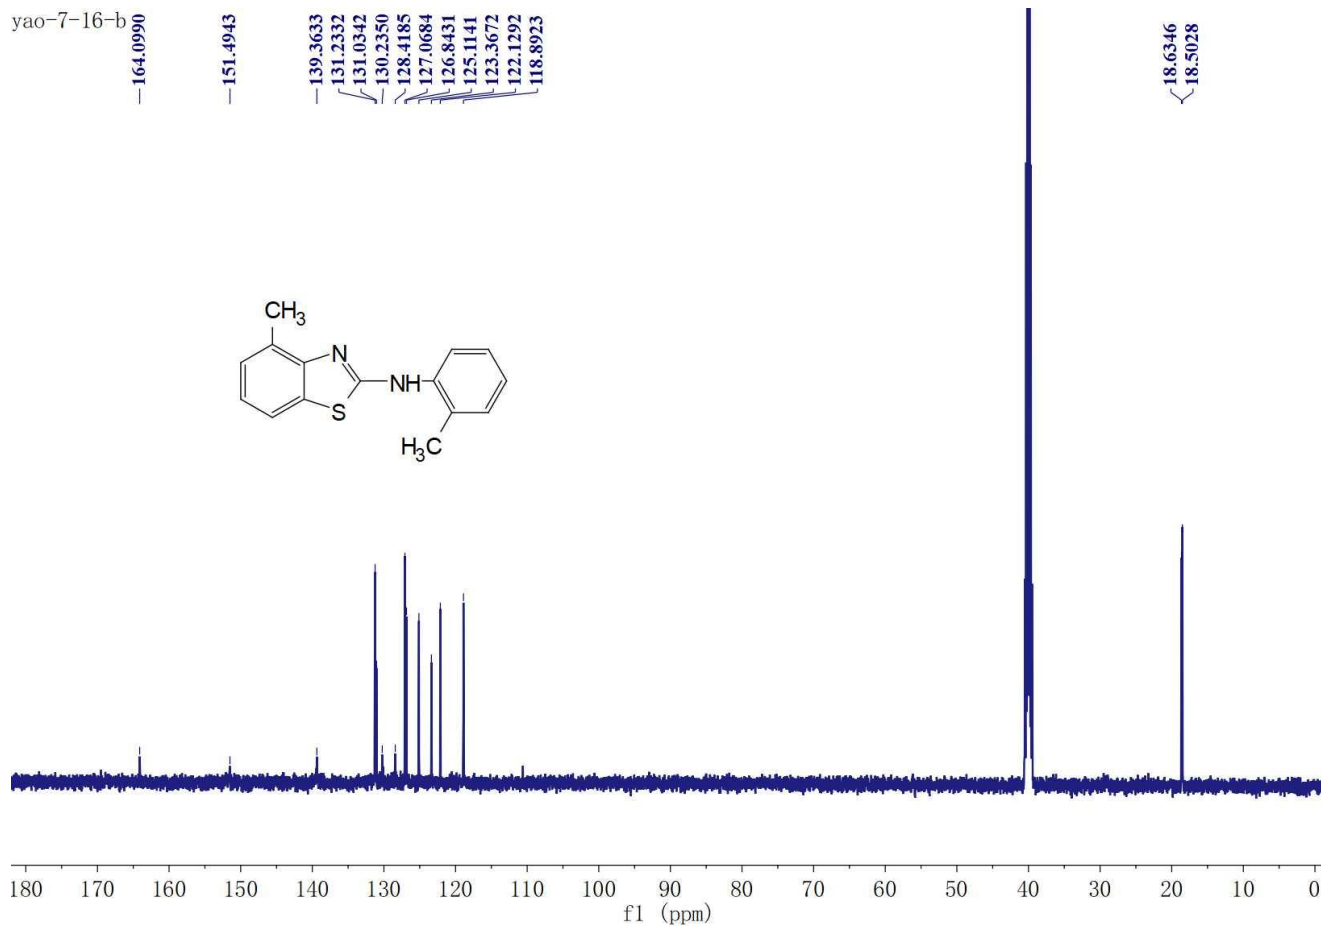

4-Methoxy-N-(2-methoxyphenyl)benzo[d]thiazol-2-amine (13)

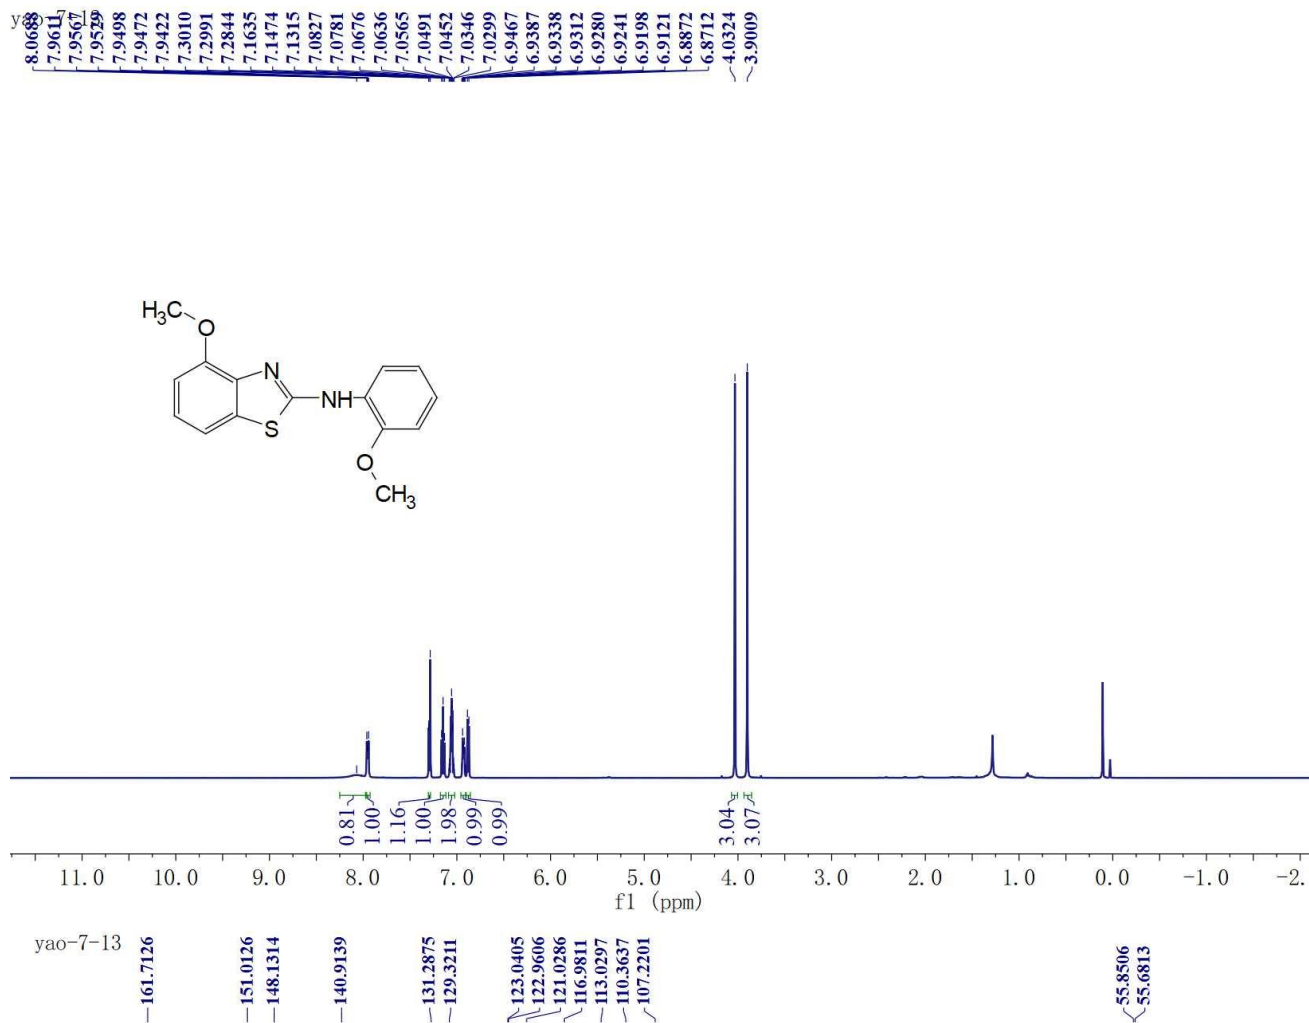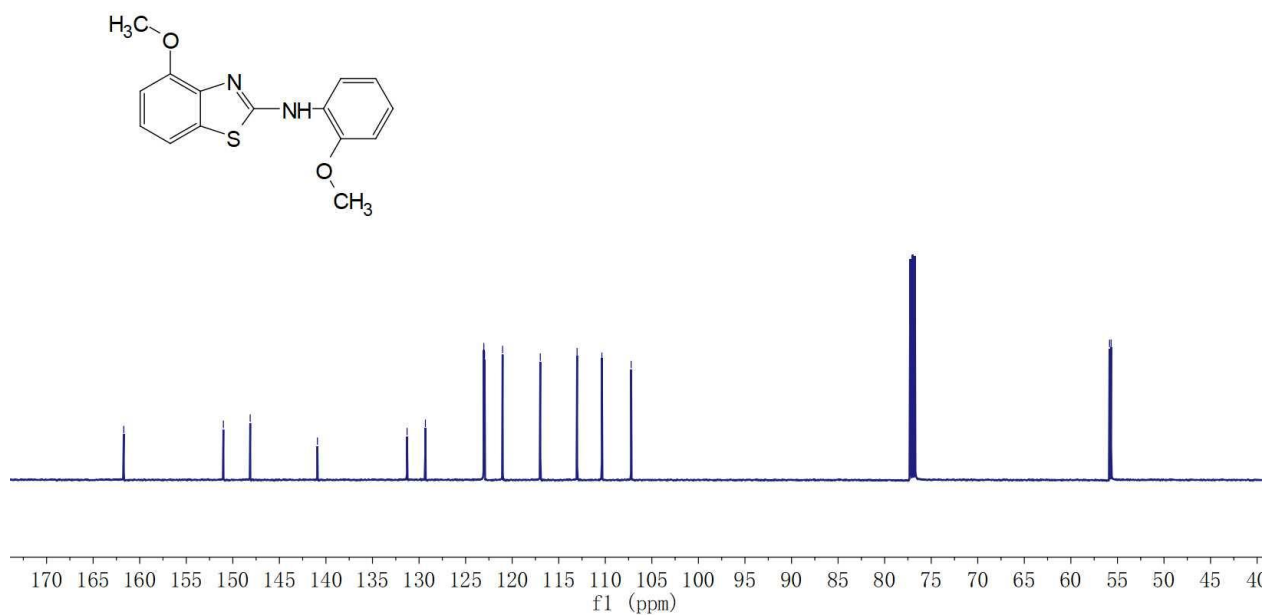

4-(Methylthio)-*N*-(3-(methylthio)phenyl)benzo[*d*]thiazol-2-amine (14)

yao-8-21-a

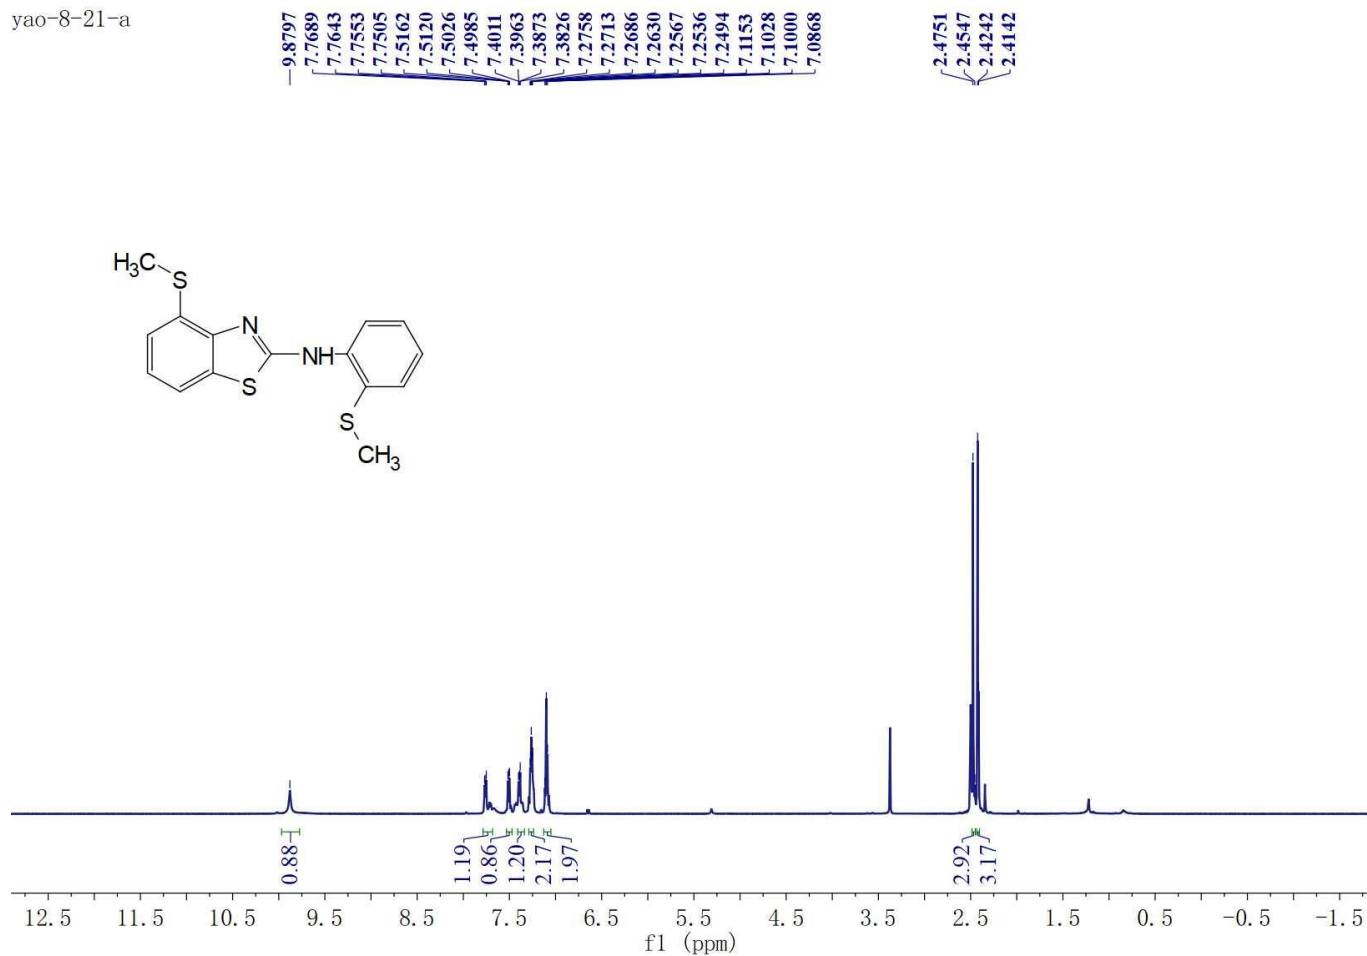

yao-8-21-a

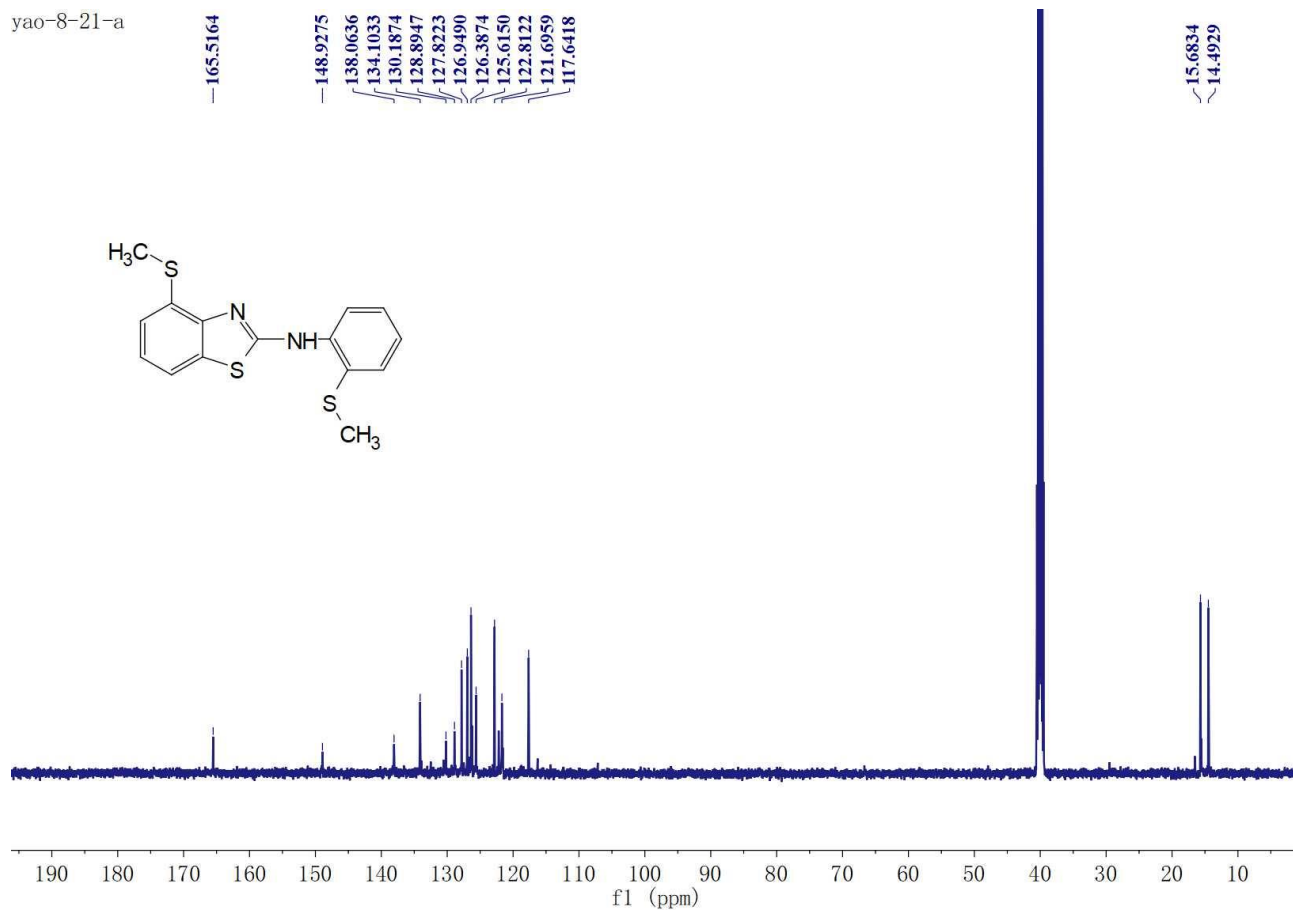

***N*-(Biphenyl-2-yl)-4-phenylbenzo[*d*]thiazol-2-amine (15)**

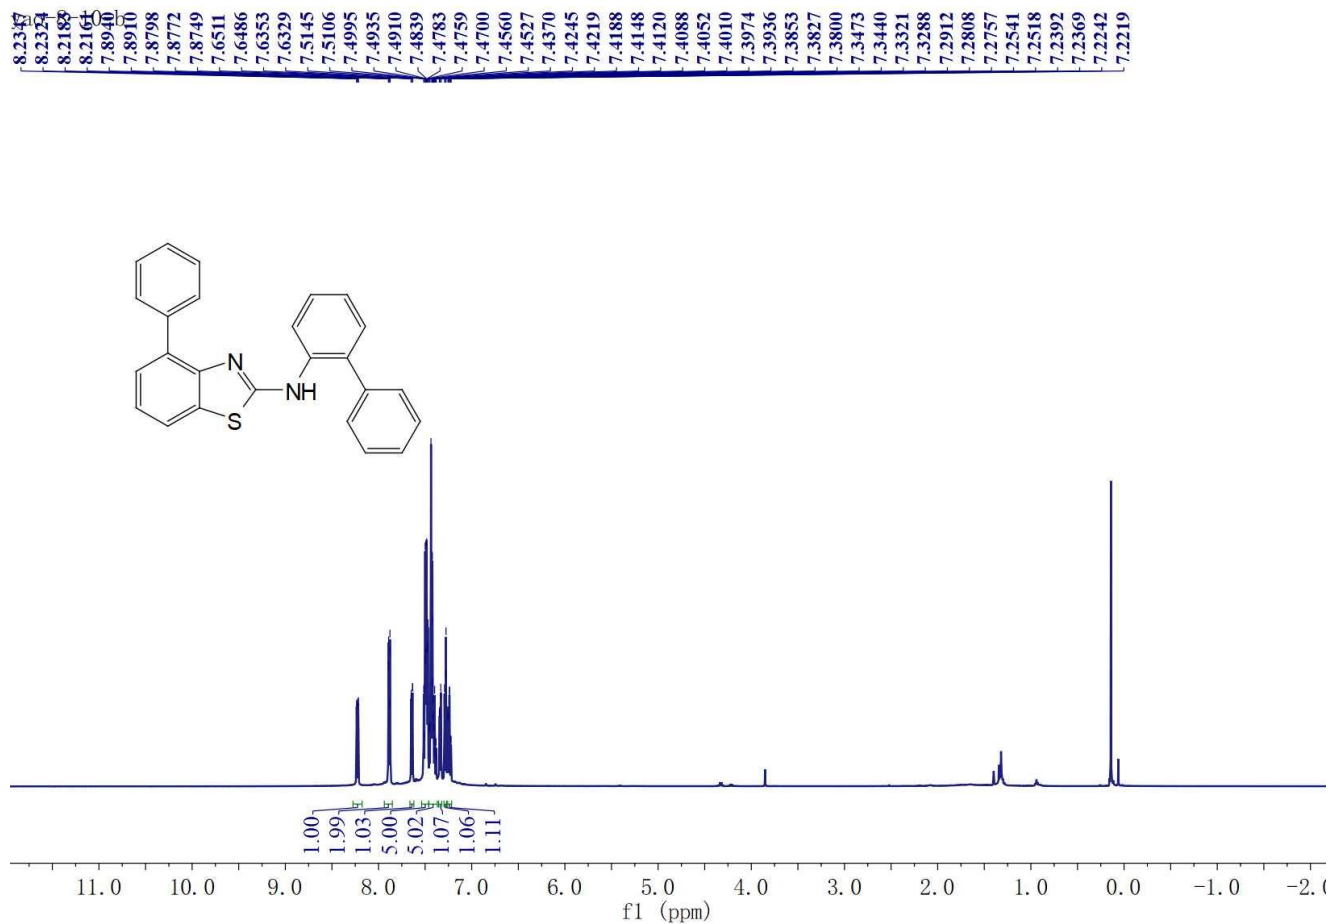

yao-8-10-b

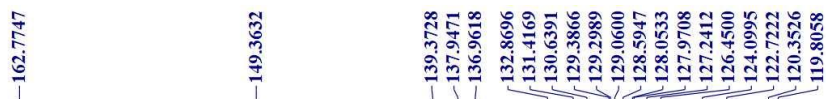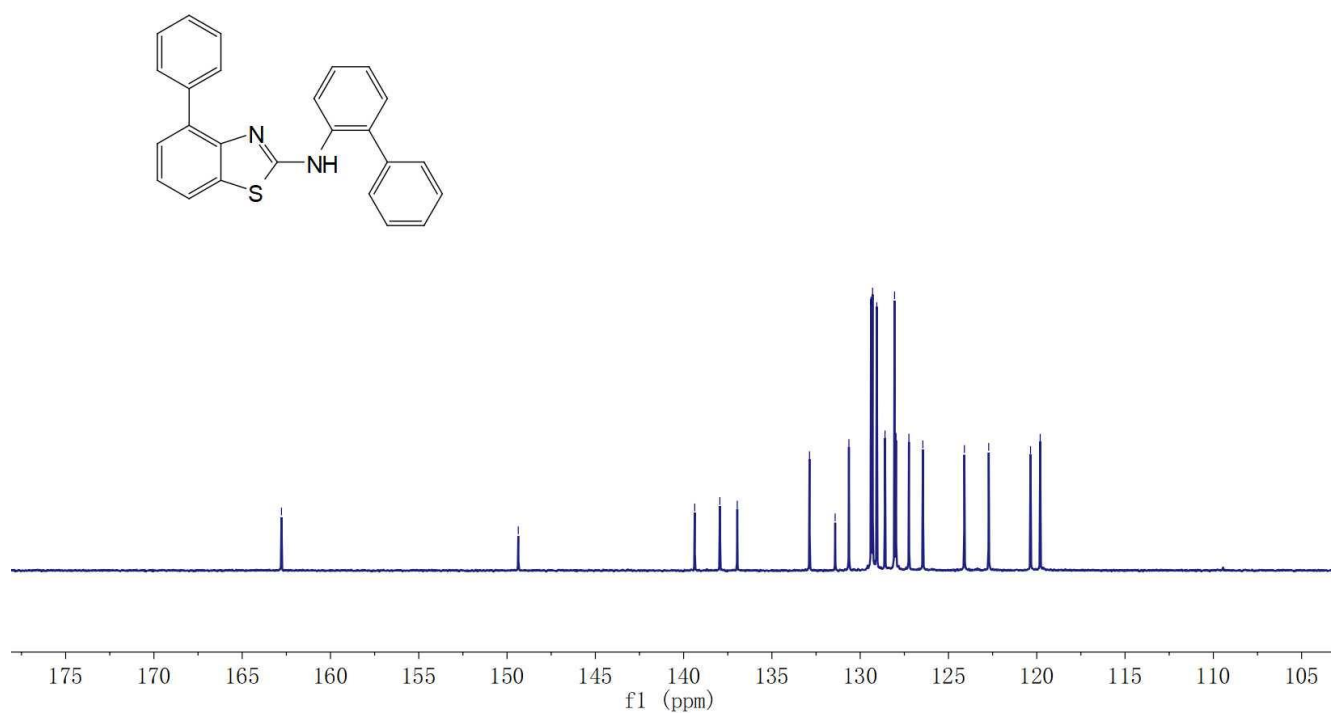

# 6-Chloro-N-(4-chloro-2-methylphenyl)-4-methylbenzo[d]thiazol-2-amine (16)

yao-8-21

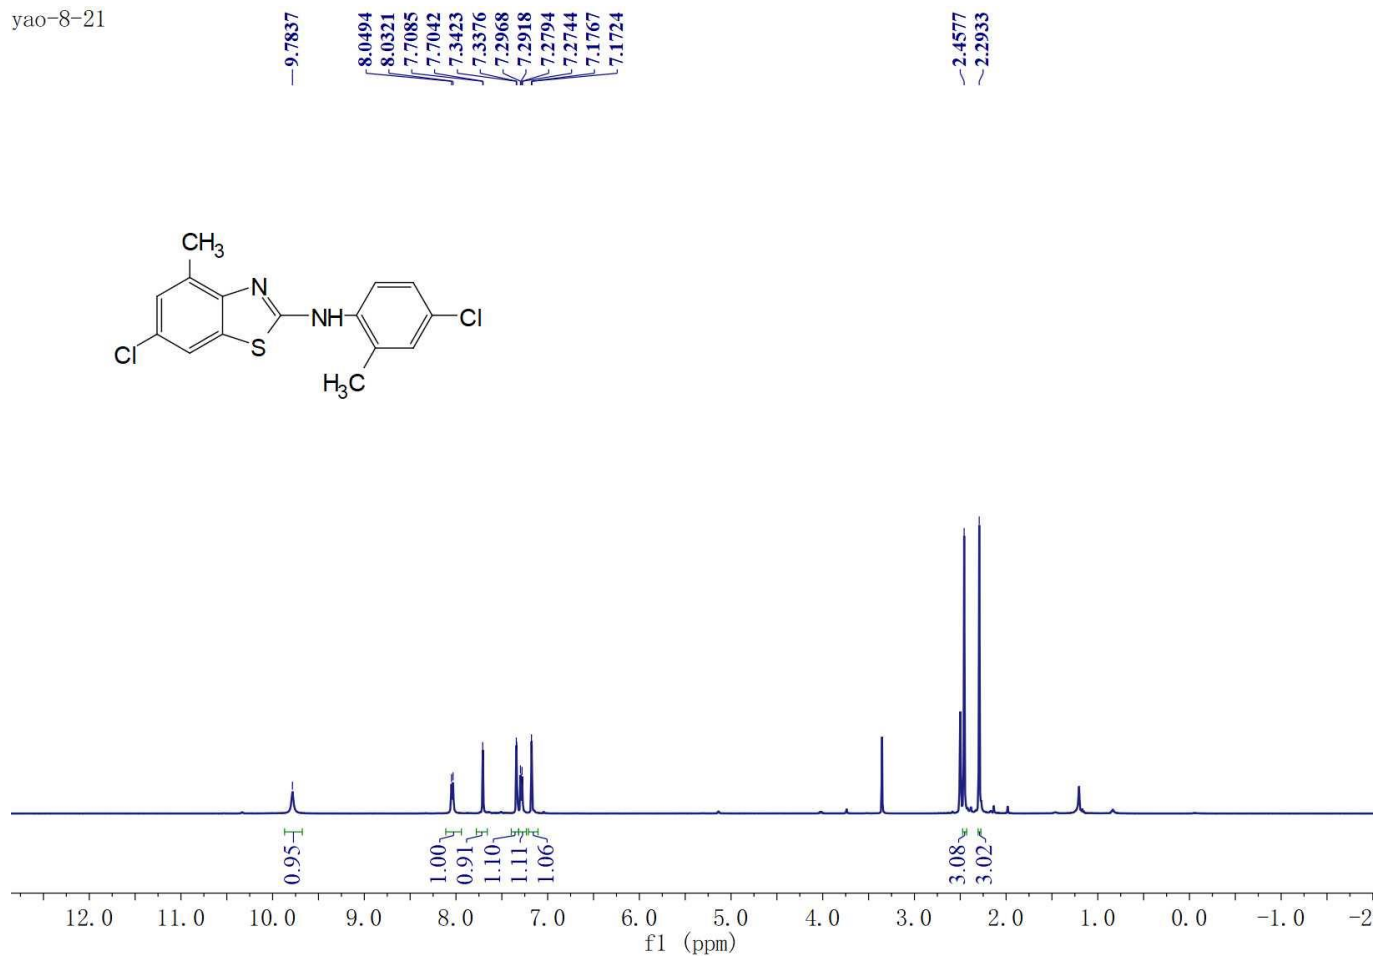

yao-8-21

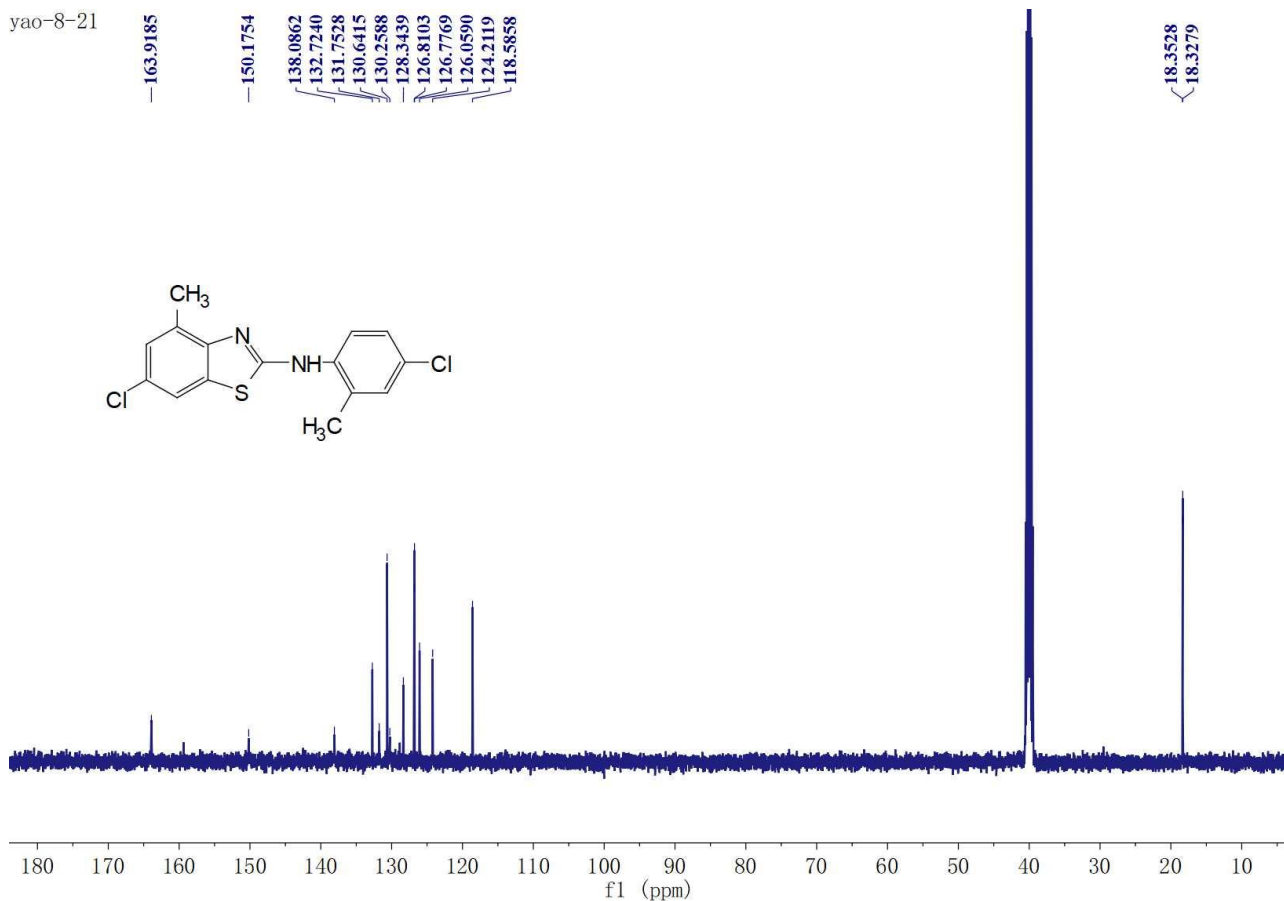



# 6-Bromo-N-(4-bromo-2-methylphenyl)-4-methylbenzo[d]thiazol-2-amine (17)

yao-10-8-a

9.7697  
7.9926  
7.9754  
7.8275  
7.8230  
7.4705  
7.4655  
7.4205  
7.4152  
7.4034  
7.3983  
7.2988  
7.2943  
2.4576  
2.2919

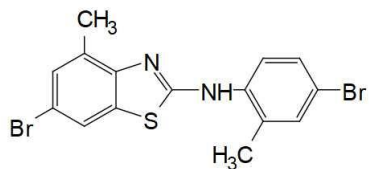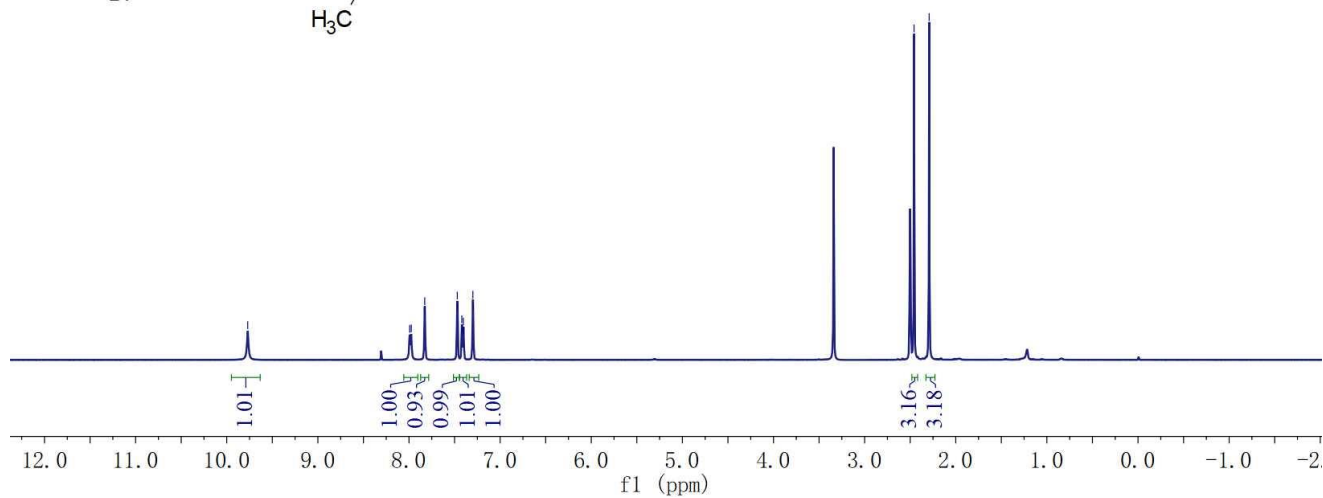

yao-10-8-a

163.8020  
150.4953  
138.4900  
133.4792  
133.0299  
132.2397  
130.7438  
129.6998  
129.4768  
124.5098  
121.3470  
116.5169  
113.8582  
18.2508  
18.2326

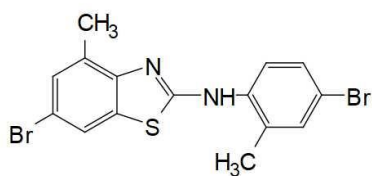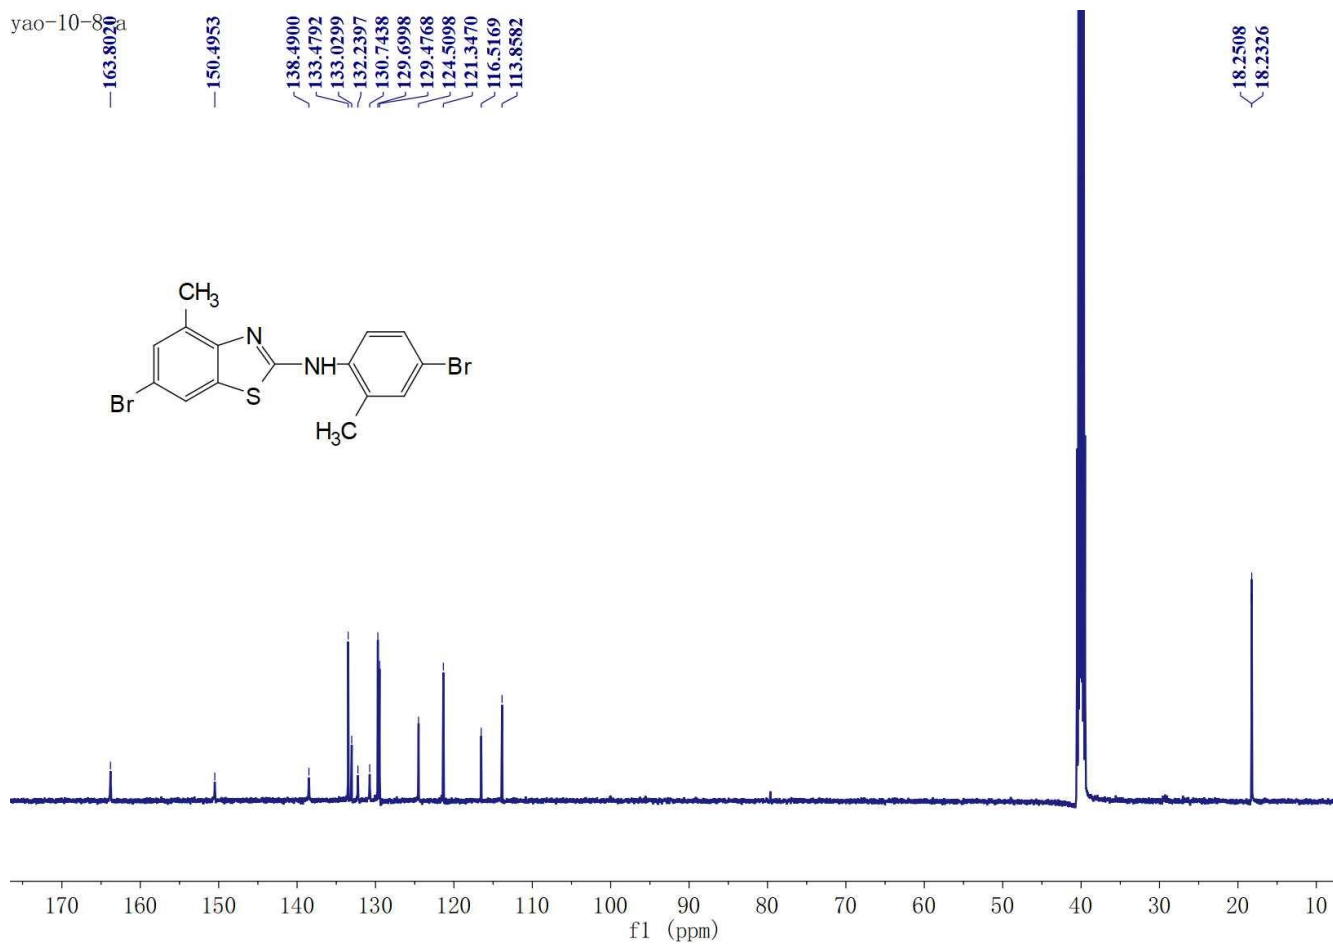

# N-(2,4-dimethylphenyl)-4,6-dimethylbenzo[d]thiazol-2-amine (18)

yao-8-6-c

7.7059  
7.4809  
7.4653  
7.2061  
7.2030  
7.0919  
7.0882  
7.0820  
7.0779  
7.0663  
7.0622  
6.9394  
2.4826  
2.3537  
2.3505  
2.2846

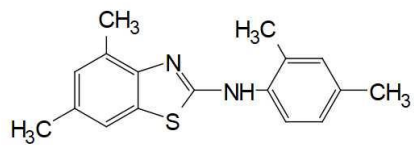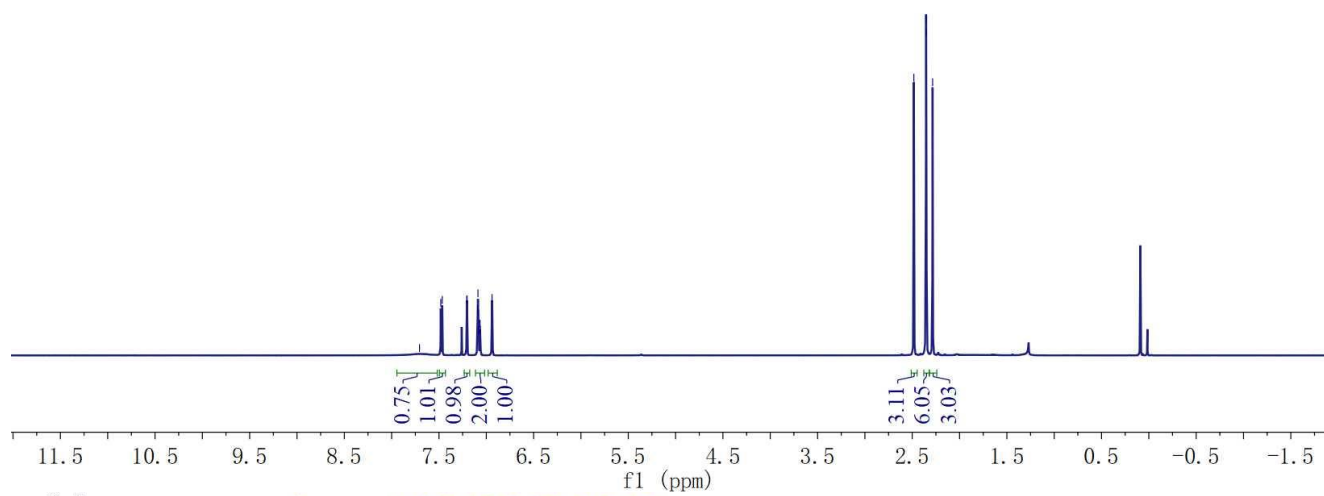

yao-8-6-c

165.8137  
148.8151  
136.1410  
135.8984  
132.4328  
131.8474  
131.5550  
130.1829  
128.3345  
128.1137  
127.7242  
124.4168  
118.2361  
21.1519  
20.9494  
18.2378  
17.7396

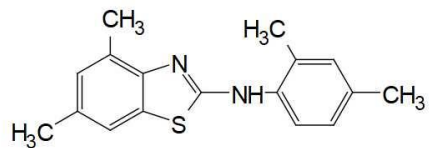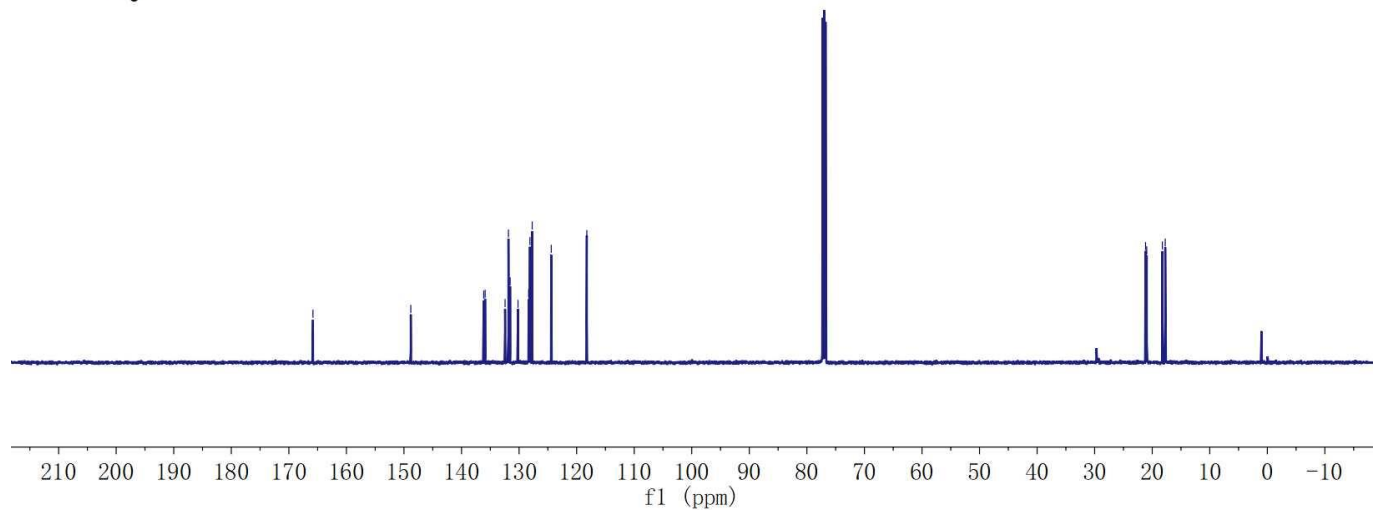

# N-(2-Bromo-4,6-dimethylphenyl)-4,6-dimethylbenzo[d]thiazol-2-amine (19)

yao-9-26-a

7.3717  
7.3678  
7.1661  
7.0743  
6.9068

2.3898  
2.3560  
2.3471  
2.3325

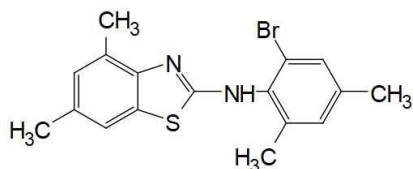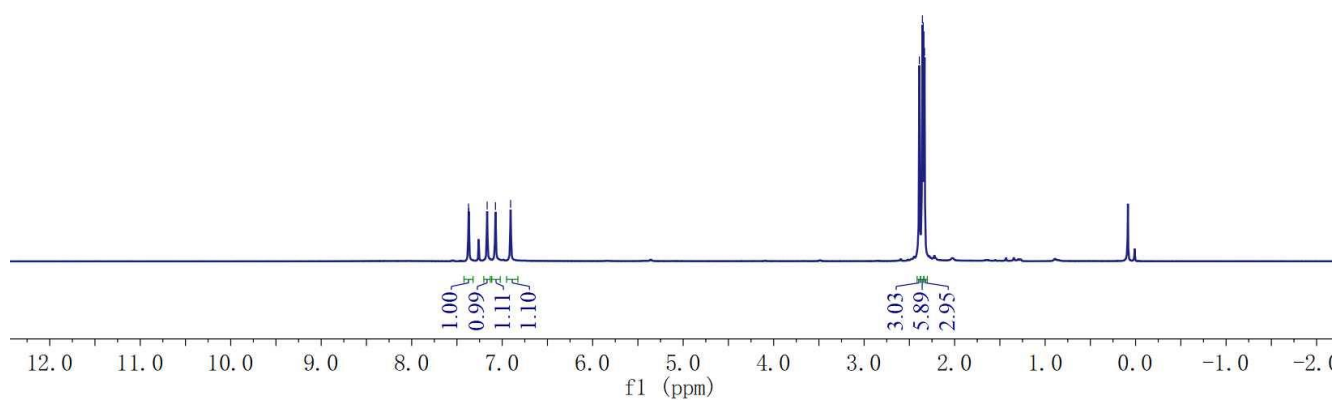

yao-9-26-a

167.1540

148.9896  
139.5885  
139.1949  
134.8005  
131.6497  
131.4317  
131.2492  
130.4391  
128.2907  
128.0917  
124.6197  
118.3689

21.1400  
20.8570  
18.9322  
18.1753

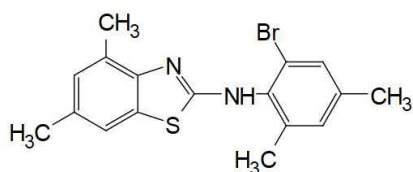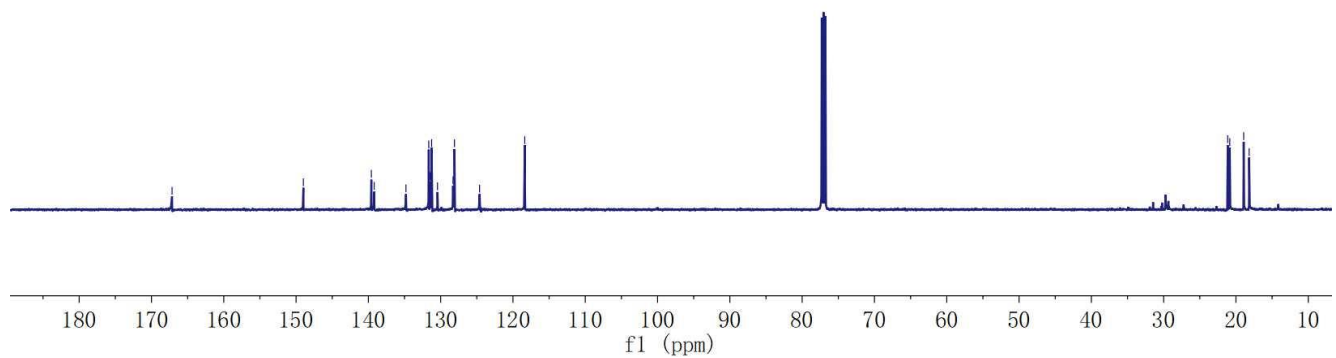

# N-(2,5-dimethylphenyl)-4,7-dimethylbenzo[d]thiazol-2-amine (20)

yao-9-1-a

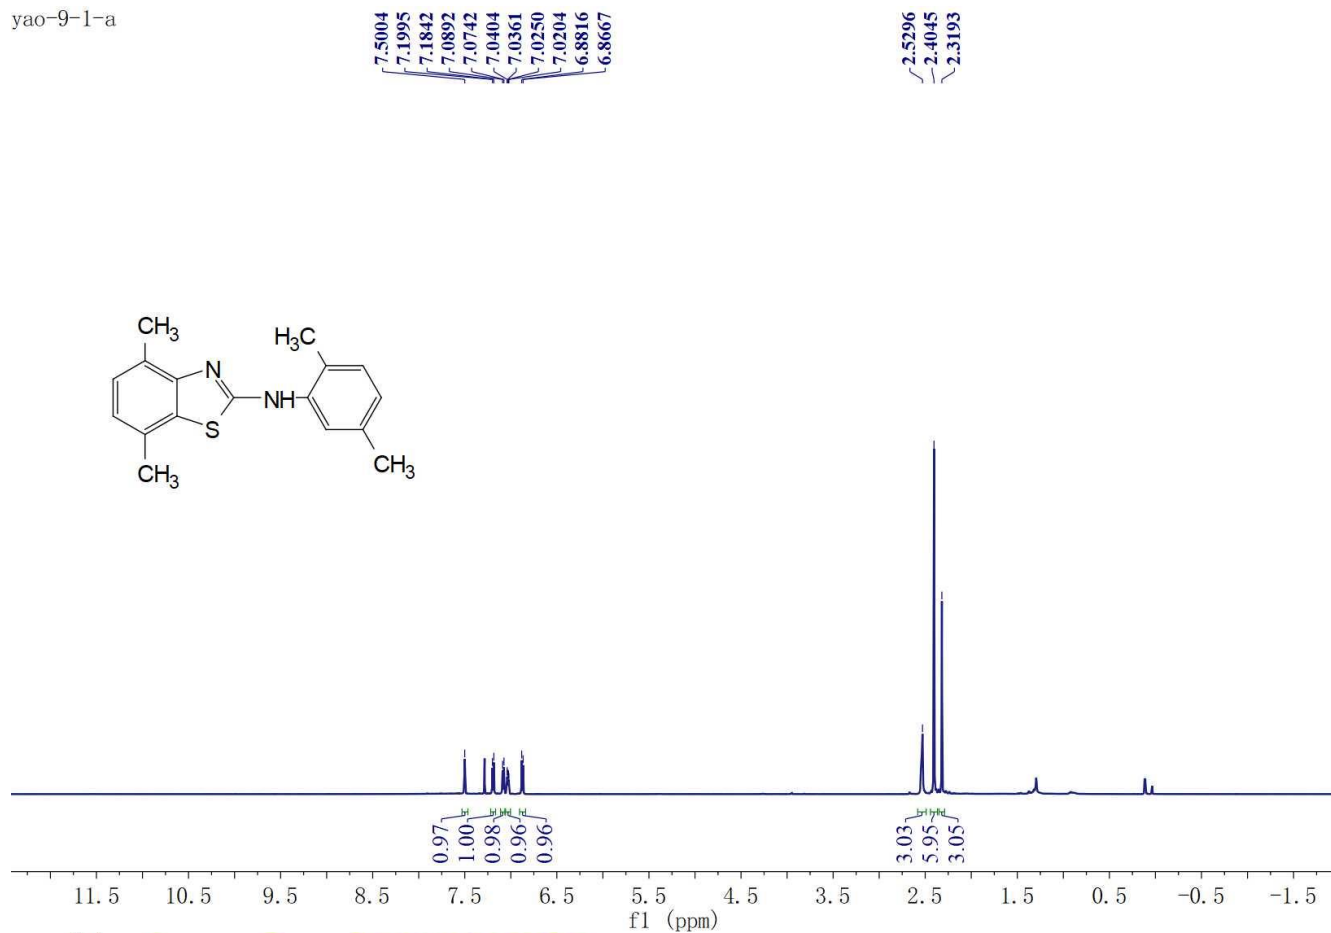

yao-9-1-a

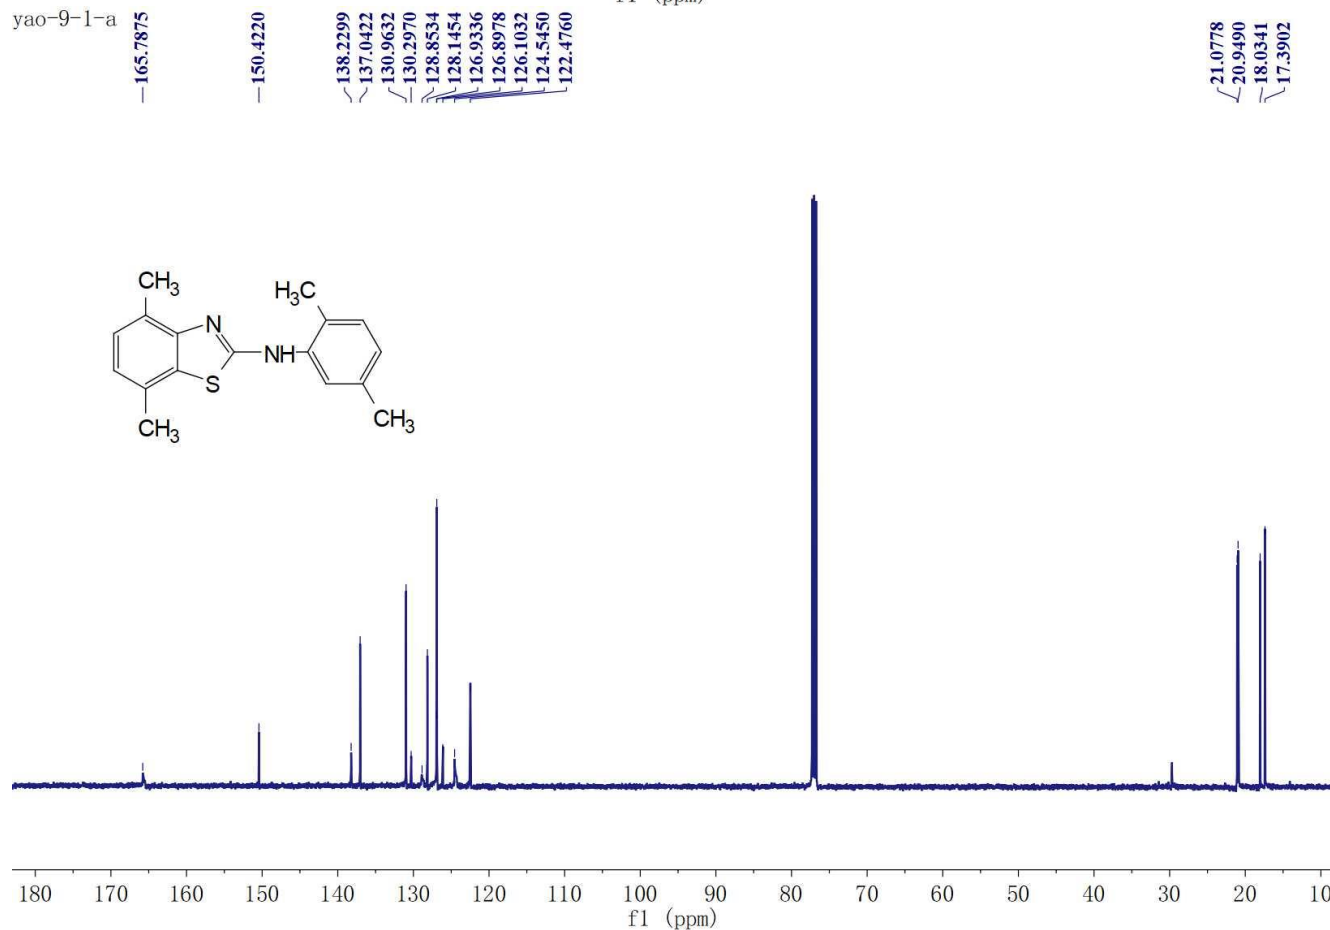

# N-(2,5-dimethylphenyl)-4,7-dimethylbenzo[d]thiazol-2-amine (21)

yao-9-1-b

7.2406  
7.1156  
6.8212  
6.7988

2.4305  
2.3823  
2.3576

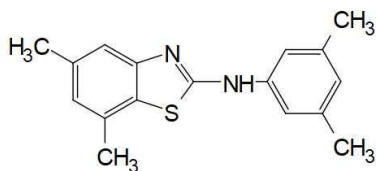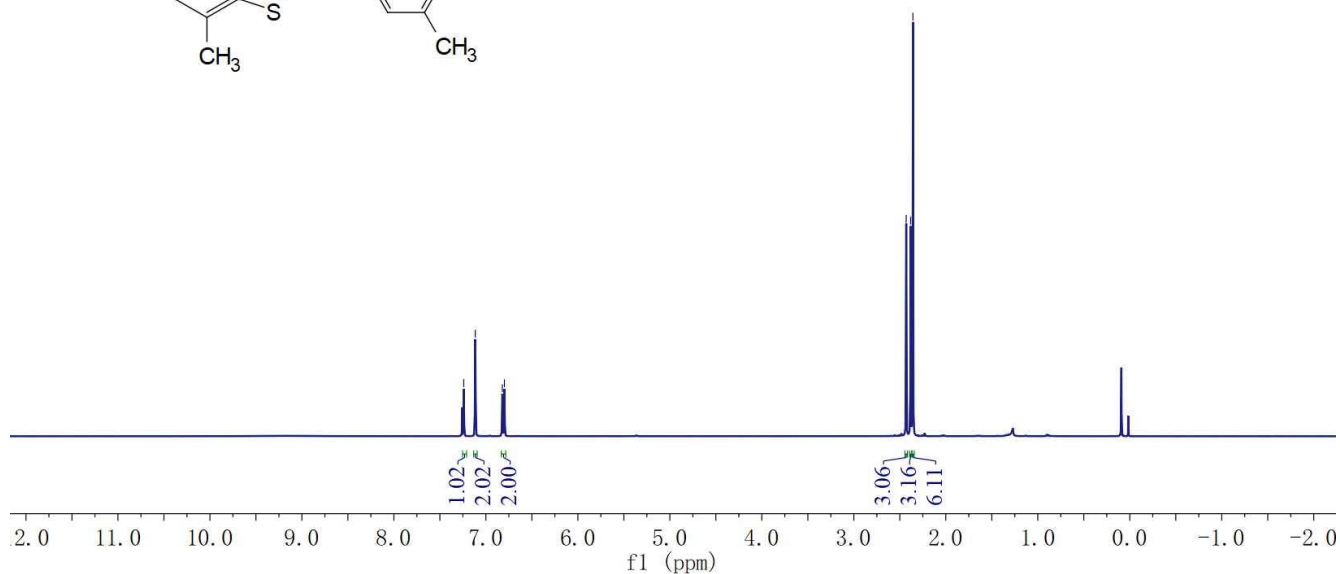

yao-9-1-b

165.1615

151.3276

140.0221

139.2668

135.9898

130.3804

126.9863

126.0792

124.1122

118.2513

118.2359

117.1583

21.4298

21.4041

21.1062

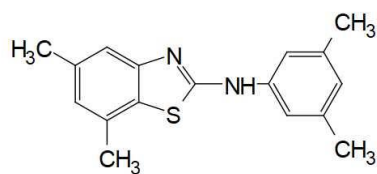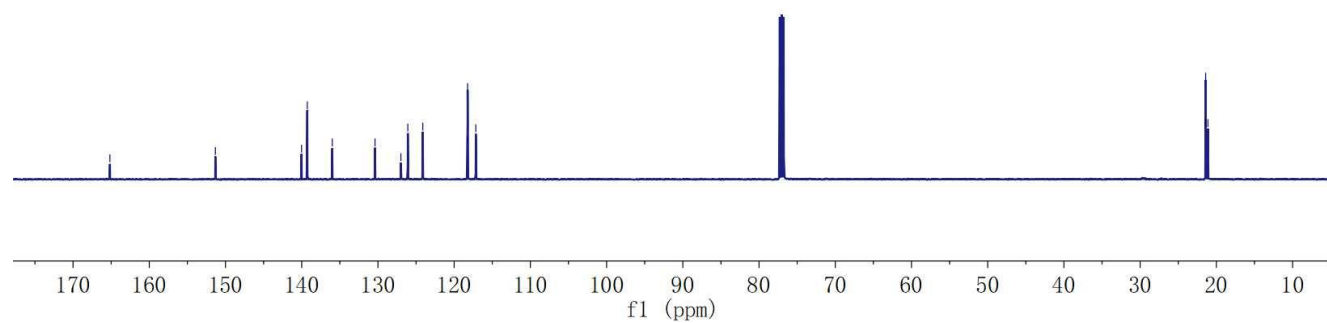

***N*-(Naphthalen-1-yl)naphtho[1,2-*d*]thiazol-2-amine (22)**

8.5145  
8.5127  
8.4989  
8.4952  
8.2007  
8.2021  
8.1878  
8.1853  
7.9388  
7.9364  
7.9333  
7.9242  
7.9215  
7.9174  
7.8607  
7.8443  
7.8330  
7.8163  
7.6232  
7.6059  
7.5900  
7.5728  
7.5698  
7.5548  
7.5531  
7.5434  
7.5408  
7.5383  
7.5273  
7.5245  
7.5124  
7.5093  
7.4988  
7.4956  
7.4928  
7.4819  
7.4791  
7.4715  
7.4688  
7.4578  
7.4550  
7.4523  
7.4413  
7.4386  
7.3904  
7.3878  
7.3766  
7.3739  
7.3711  
7.3601  
7.3575

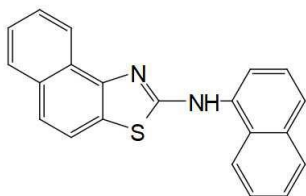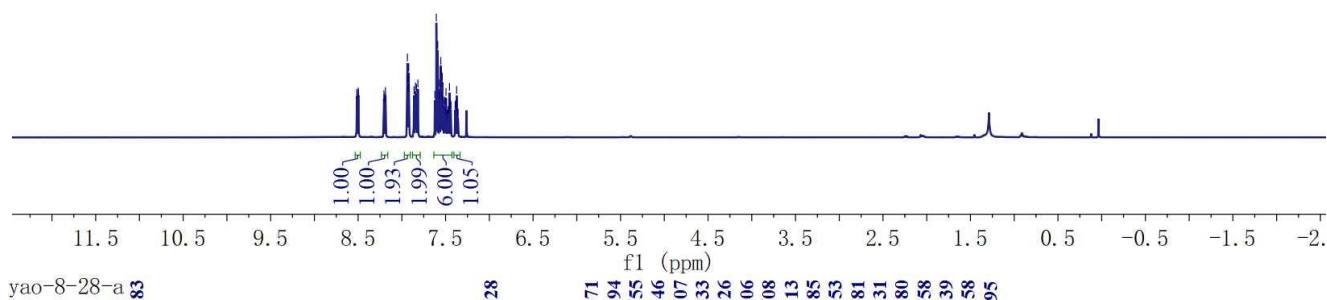

yao-8-28-a

167.9383  
147.4928  
135.9271  
134.6994  
132.1755  
128.6946  
128.6507  
128.0033  
126.9326  
126.7906  
126.7708  
126.6613  
125.9585  
125.9053  
125.4681  
125.2331  
123.6880  
122.6058  
121.7439  
121.2358  
118.6495

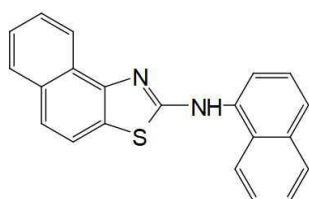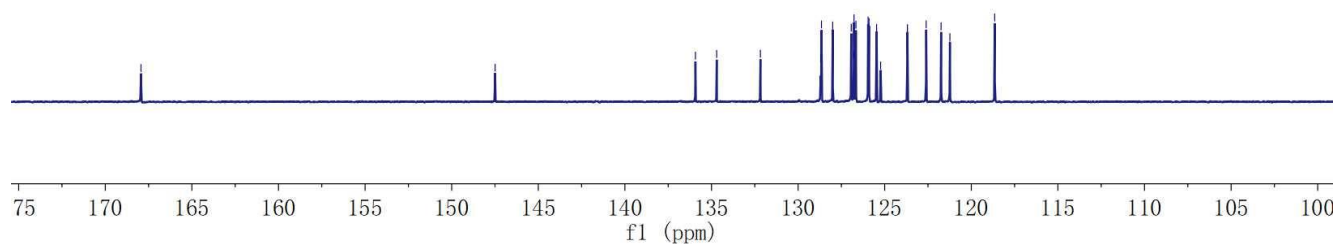

6-Methyl-N-(4-nitrophenyl)benzo[d]thiazol-2-amine (23)

yao-9-20-b  
-11.1643

8.2824  
8.2681  
8.2640  
8.0023  
7.9979  
7.9880  
7.9838  
7.6908  
7.6114  
7.5950  
7.2198  
7.2164  
7.2033  
7.1998

-2.3868

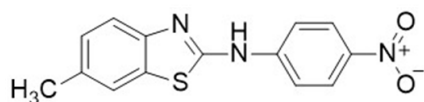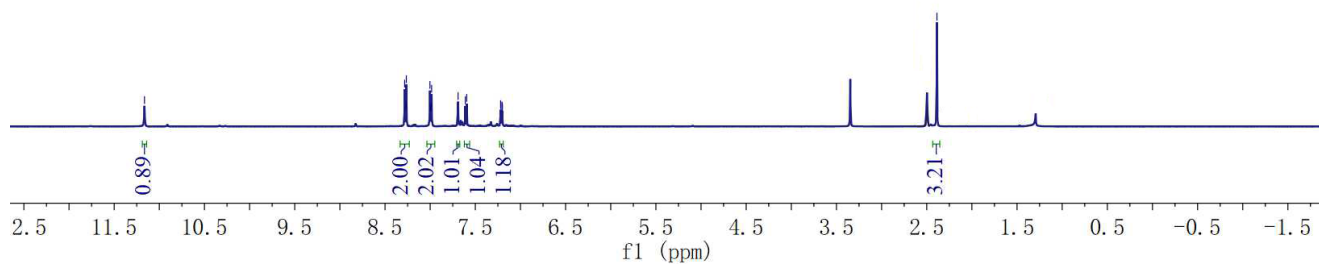

yao-9-20  
-159.8113

-149.3328  
-146.4807  
-140.7520  
-132.6622  
-130.3694  
-129.5317  
-127.3399  
-125.4226  
-121.1401  
-119.6670  
-116.9826

-20.8935

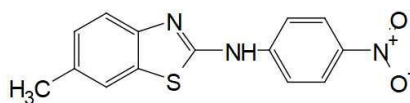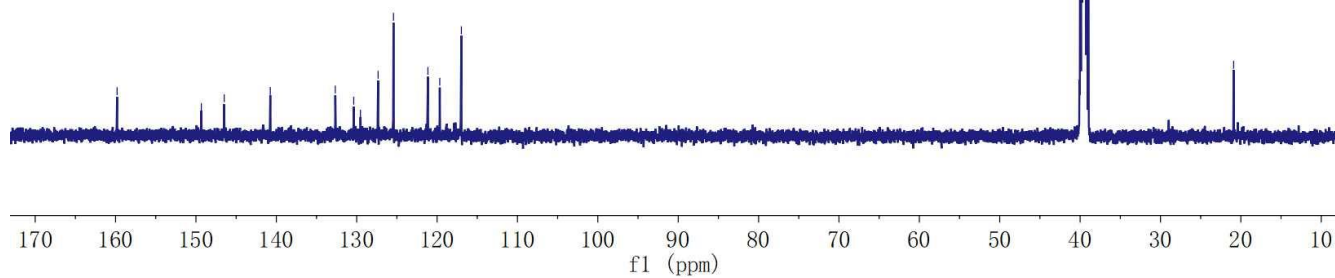

Supplement: c8ra09784d1.pdf [file c8ra09784d1.pdf]
